# Supplementary material for: Synthesis, structure and evaluation of spectral, luminescent and optoelectronic properties of Zn(ii) hexafluoroacetylacetonate complexes of triphenodioxazines
Source: Royal Society of Chemistry journal article supplement (doi:10.1039/d3nj04847k), 2023-11-27
Supplement: d3nj04847k1.pdf [file d3nj04847k1.pdf]

## Supporting Information

### **Synthesis, structure and evaluation of spectral, luminescent and optoelectronic properties of Zn(II) hexafluoroacetylacetonate complexes of triphenodioxazines**

**Eugeny P. Ivakhnenko<sup>a\*</sup>, Nadezhda I. Makarova<sup>a</sup>, Sergey E. Kislitsin<sup>a</sup>, Pavel A. Knyazev<sup>a</sup>, Andrey G. Starikov<sup>a</sup>, Oleg P. Demidov<sup>b</sup>, Gennady S. Borodkin<sup>a</sup> and Vladimir I. Minkin<sup>a\*</sup>**

*<sup>a</sup> Institute of Physical and Organic Chemistry, Southern Federal University, 194/2 Stachki St., 344090, Rostov-on-Don, Russian Federation.*

*<sup>b</sup> North Caucasus Federal University. 1 Pushkin st., 355017, Stavropol, Russian Federation.*

*\* Corresponding author. E-mail: [ivakhnenko@sfedu.ru](mailto:ivakhnenko@sfedu.ru) (E.P. Ivakhnenko).*

#### Table of content

|                                                |    |
|------------------------------------------------|----|
| 1. X-ray structural data                       | 2  |
| 2. UV/vis and emission spectra                 | 12 |
| 3. DFT study                                   | 18 |
| 4. Cyclic voltammetry                          | 18 |
| 5. <sup>1</sup> H, <sup>13</sup> C NMR spectra | 19 |

## 1. X-ray structural data

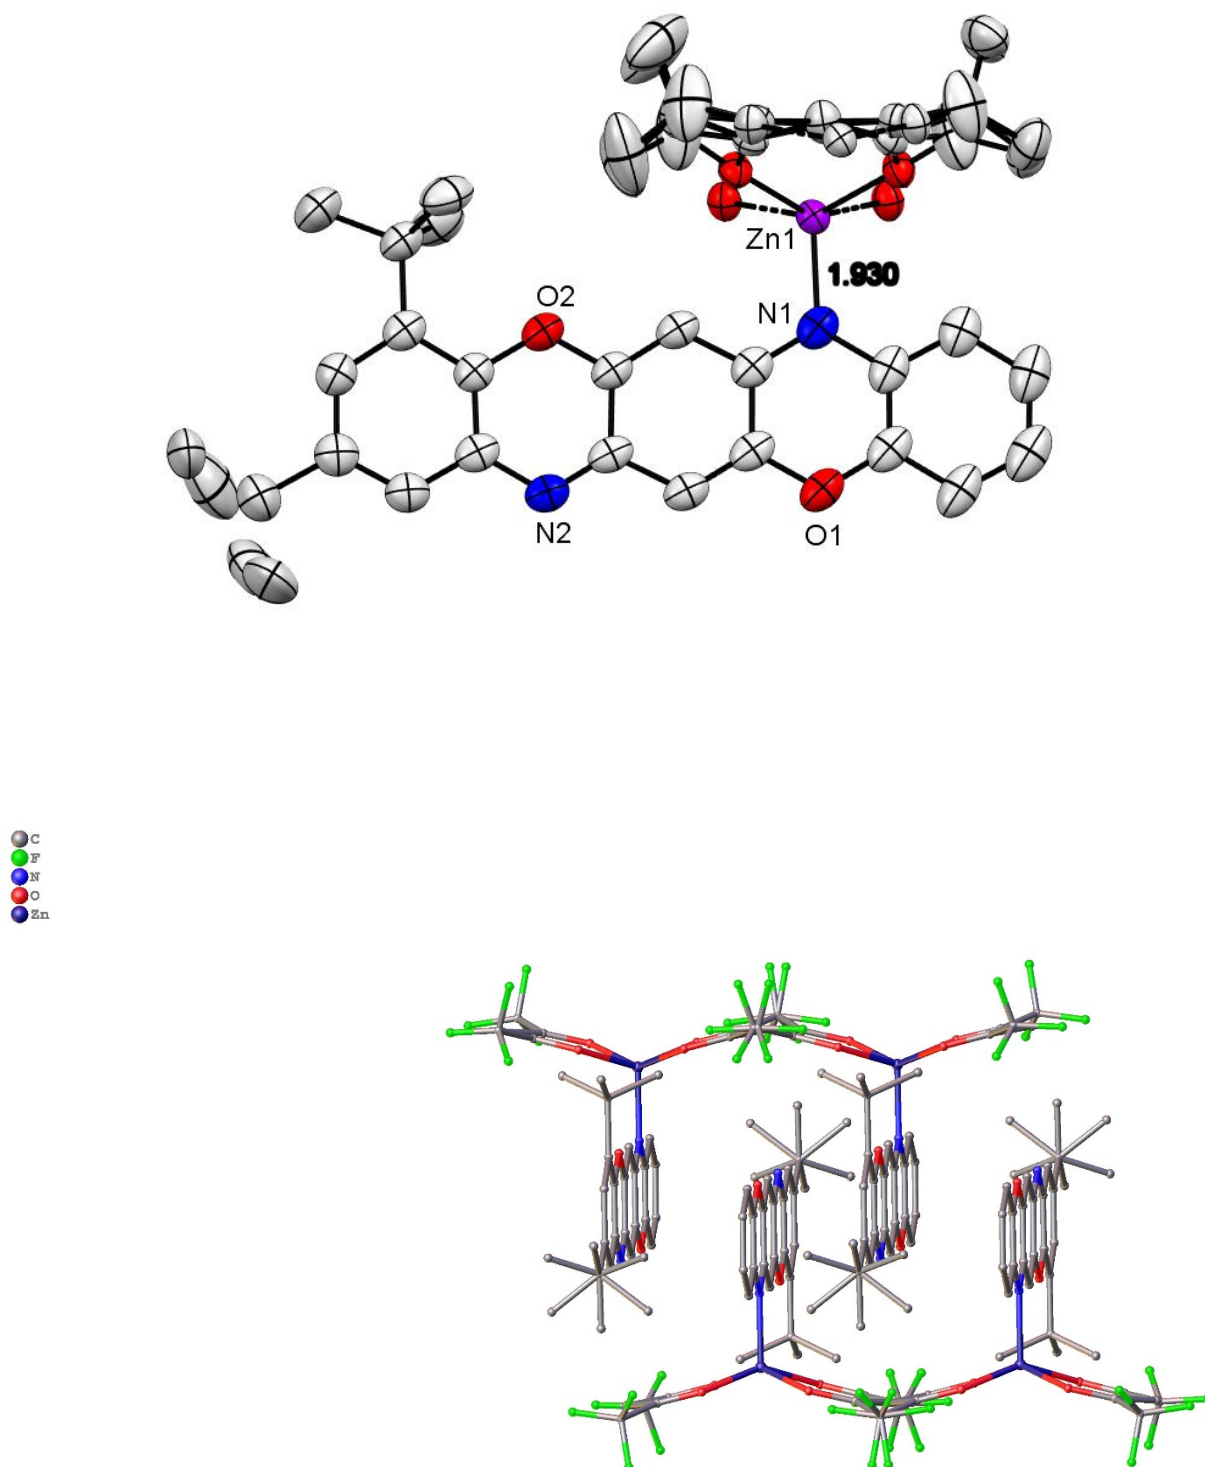

Fig S1. Molecular and crystalline structures of **4a·TPDO**. View of the molecule in the asymmetric unit (top); and crystal packing (down).

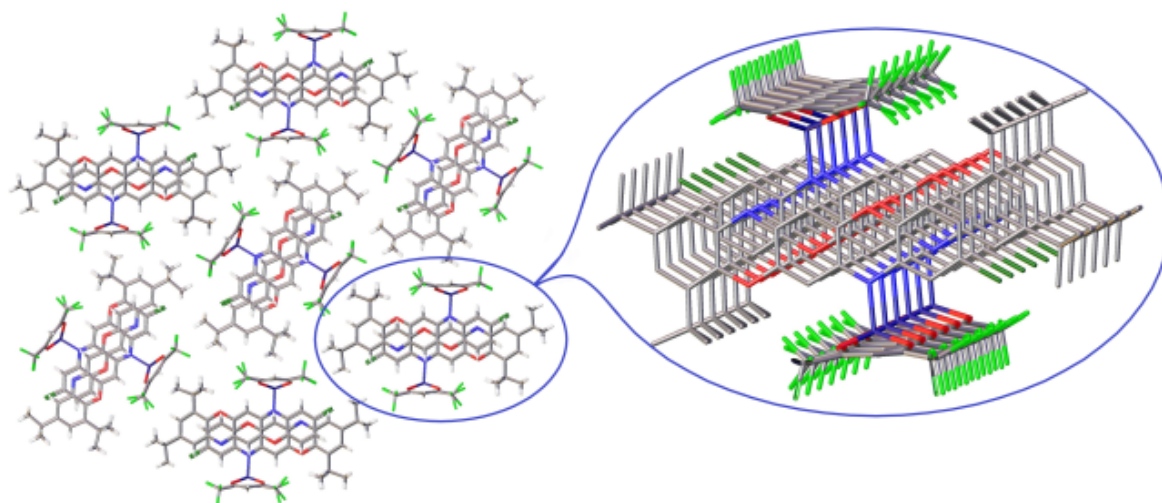

Fig S2. Crystal packing of complex **5d**.

**Table S1.** Crystallographic parameters of **4a·TPDO**, **4b·TPDO** and **5d**.

| Parameter                             | <b>4a·TPDO</b>                                                                   | <b>4b·TPDO</b>                                                                                   | <b>5d</b>                                                                                      |
|---------------------------------------|----------------------------------------------------------------------------------|--------------------------------------------------------------------------------------------------|------------------------------------------------------------------------------------------------|
| Empirical formula                     | C <sub>62</sub> H <sub>54</sub> F <sub>12</sub> N <sub>4</sub> O <sub>8</sub> Zn | C <sub>62</sub> H <sub>52</sub> Cl <sub>2</sub> F <sub>12</sub> N <sub>4</sub> O <sub>8</sub> Zn | C <sub>54</sub> H <sub>46</sub> F <sub>24</sub> N <sub>2</sub> O <sub>10</sub> Zn <sub>2</sub> |
| Color                                 | dark brown                                                                       | -                                                                                                | red                                                                                            |
| Formula weight, g/mol                 | 1276.46                                                                          | 1345.34                                                                                          | 1469.67                                                                                        |
| Temperature, K                        | 293(2)                                                                           | 100(2)                                                                                           | 100(10)                                                                                        |
| Crystal system                        | orthorhombic                                                                     | monoclinic                                                                                       | triclinic                                                                                      |
| Space group                           | P n m a                                                                          | P 1 21/c 1                                                                                       | P-1                                                                                            |
| <i>a</i> , Å                          | 17.5047(3)                                                                       | 13.3529(3)                                                                                       | 9.2874(2)                                                                                      |
| <i>b</i> , Å                          | 6.79920(10)                                                                      | 25.4867(5)                                                                                       | 13.0910(2)                                                                                     |
| <i>c</i> , Å                          | 25.4483(4)                                                                       | 17.6734(3)                                                                                       | 13.6559(3)                                                                                     |
| <i>α</i> , °                          | 90.000                                                                           | 90.000                                                                                           | 100.796(2)                                                                                     |
| <i>β</i> , °                          | 90.000                                                                           | 90.040(2)                                                                                        | 103.403(2)                                                                                     |
| <i>γ</i> , °                          | 90.000                                                                           | 90.000                                                                                           | 107.607(2)                                                                                     |
| Volume, Å <sup>3</sup>                | 3028.80(8)                                                                       | 6014.6(2)                                                                                        | 1478.90(6)                                                                                     |
| <i>Z</i>                              | 2                                                                                | 4                                                                                                | 1                                                                                              |
| Calculated density, g/cm <sup>3</sup> | 1.400                                                                            | 1.486                                                                                            | 1.650                                                                                          |
| μ(MoK α), mm <sup>-1</sup>            | 1.387                                                                            | 2.226                                                                                            | 2.218                                                                                          |
| Theta range for data collection       | ≤ 67.684                                                                         | ≤ 67.684                                                                                         | ≤ 67.684                                                                                       |
| Reflections collected                 | 24874                                                                            | 35219                                                                                            | 25663                                                                                          |
| Independent reflections               | 3450/2792                                                                        | 11223/9093                                                                                       | 6156/5817                                                                                      |
| Index ranges                          | -22 < <i>h</i> < 18<br>-8 < <i>k</i> < 8<br>-31 < <i>l</i> < 32                  | -16 < <i>h</i> < 12<br>-31 < <i>k</i> < 31<br>-21 < <i>l</i> < 21                                | -11 < <i>h</i> < 10<br>-14 < <i>k</i> < 16<br>-17 < <i>l</i> < 16                              |
| Parameters                            | 325                                                                              | 1038                                                                                             | 421                                                                                            |
| Goodness-of-fit                       | 1.056                                                                            | 1.040                                                                                            | 1.050                                                                                          |
| R indexes (all data)                  | 0.0744                                                                           | 0.0708                                                                                           | 0.0317                                                                                         |

**Table S2.** Bond lengths [Å] and valence angles [rad] for **4a·TPDO**.

| Atom | Atom | Distance, Å | Atom | Atom | Distance, Å |
|------|------|-------------|------|------|-------------|
| Zn1  | N1   | 1.930(4)    | C16  | C20  | 1.549(6)    |
| Zn1  | O4   | 2.045(3)    | C16  | C15  | 1.397(6)    |
| Zn1  | O3   | 2.051(3)    | C27  | F5   | 1.267(7)    |

|      |      |           |            |      |           |      |           |
|------|------|-----------|------------|------|-----------|------|-----------|
| O2   | C18  | 1.358(4)  | C27        | F4   | 1.248(6)  |      |           |
| O2   | C17  | 1.381(5)  | C27        | C26  | 1.524(8)  |      |           |
| O1   | C9   | 1.367(4)  | C27        | F6   | 1.272(12) |      |           |
| O1   | C8   | 1.365(6)  | C8         | C7   | 1.393(6)  |      |           |
| N2   | C12  | 1.381(5)  | C14        | C13  | 1.371(6)  |      |           |
| N2   | C11  | 1.289(5)  | C14        | C15  | 1.400(6)  |      |           |
| F2   | C23  | 1.309(6)  | C14        | C19  | 1.537(7)  |      |           |
| N1   | C3   | 1.415(5)  | C25        | C26  | 1.542(13) |      |           |
| N1   | C2   | 1.326(5)  | C25        | C24  | 1.542(12) |      |           |
| C23  | F1   | 1.302(6)  | C20        | C22  | 1.538(5)  |      |           |
| C23  | C24  | 1.537(7)  | C20        | C22  | 1.538(5)  |      |           |
| C23  | F3   | 1.298(12) | C20        | C21  | 1.527(7)  |      |           |
| C18  | C1   | 1.339(6)  | C6         | C5   | 1.383(8)  |      |           |
| C18  | C11  | 1.457(5)  | C6         | C7   | 1.357(8)  |      |           |
| C12  | C17  | 1.400(5)  | C5         | C4   | 1.400(6)  |      |           |
| C12  | C13  | 1.391(6)  | O4         | C24  | 1.247(6)  |      |           |
| C17  | C16  | 1.388(5)  | O3         | C26  | 1.244(5)  |      |           |
| C9   | C2   | 1.456(5)  | C19        | C29  | 1.531(10) |      |           |
| C9   | C10  | 1.336(6)  | C19        | C29  | 1.531(10) |      |           |
| C1   | C2   | 1.422(5)  | C19        | C28  | 1.447(16) |      |           |
| C11  | C10  | 1.439(5)  | C19        | C31  | 1.451(19) |      |           |
| C3   | C8   | 1.388(6)  | C19        | C30  | 1.592(17) |      |           |
| C3   | C4   | 1.386(6)  | C19        | C30  | 1.592(17) |      |           |
| Atom | Atom | Atom      | Angle, °   | Atom | Atom      | Atom | Angle, °  |
| N1   | Zn1  | O4        | 104.66(12) | F4   | C27       | F6   | 107.7(8)  |
| N1   | Zn1  | O3        | 106.39(12) | F6   | C27       | C26  | 116.1(6)  |
| O4   | Zn1  | O3        | 86.12(13)  | C9   | C10       | C11  | 121.6(4)  |
| C18  | O2   | C17       | 119.5(3)   | O1   | C8        | C3   | 121.8(4)  |
| C8   | O1   | C9        | 118.9(4)   | O1   | C8        | C7   | 117.3(5)  |
| C11  | N2   | C12       | 117.6(3)   | C3   | C8        | C7   | 120.9(5)  |
| C3   | N1   | Zn1       | 122.5(3)   | C13  | C14       | C15  | 118.1(4)  |
| C2   | N1   | Zn1       | 119.8(3)   | C13  | C14       | C19  | 122.1(4)  |
| C2   | N1   | C3        | 117.7(4)   | C15  | C14       | C19  | 119.8(4)  |
| F2   | C23  | C24       | 108.5(7)   | C26  | C25       | C24  | 102.3(11) |
| F1   | C23  | F2        | 104.2(6)   | C14  | C13       | C12  | 121.3(4)  |
| F1   | C23  | C24       | 111.9(7)   | C22  | C20       | C16  | 110.5(2)  |
| F3   | C23  | F2        | 108.5(10)  | C22  | C20       | C16  | 110.5(2)  |
| F3   | C23  | F1        | 109.4(6)   | C22  | C20       | C22  | 109.6(4)  |
| F3   | C23  | C24       | 113.9(5)   | C21  | C20       | C16  | 112.1(5)  |
| O2   | C18  | C11       | 118.2(4)   | C21  | C20       | C22  | 107.1(3)  |
| C1   | C18  | O2        | 118.1(3)   | C21  | C20       | C22  | 107.1(3)  |
| C1   | C18  | C11       | 123.8(3)   | C16  | C15       | C14  | 123.8(4)  |
| N2   | C12  | C17       | 122.4(4)   | C7   | C6        | C5   | 120.6(5)  |
| N2   | C12  | C13       | 119.3(4)   | C6   | C5        | C4   | 119.8(5)  |

|     |     |     |          |     |     |     |           |
|-----|-----|-----|----------|-----|-----|-----|-----------|
| C13 | C12 | C17 | 118.3(4) | C6  | C7  | C8  | 119.9(6)  |
| O2  | C17 | C12 | 119.0(3) | C24 | O4  | Zn1 | 127.1(3)  |
| O2  | C17 | C16 | 117.7(3) | C26 | O3  | Zn1 | 127.6(3)  |
| C16 | C17 | C12 | 123.2(4) | C14 | C19 | C30 | 108.5(7)  |
| O1  | C9  | C2  | 119.0(4) | C14 | C19 | C30 | 108.5(7)  |
| C10 | C9  | O1  | 118.4(4) | C29 | C19 | C14 | 105.6(5)  |
| C10 | C9  | C2  | 122.6(4) | C29 | C19 | C14 | 105.6(5)  |
| C18 | C1  | C2  | 120.6(4) | C29 | C19 | C29 | 110.1(12) |
| N2  | C11 | C18 | 123.4(3) | C29 | C19 | C30 | 62.0(11)  |
| N2  | C11 | C10 | 121.7(3) | C29 | C19 | C30 | 145.9(8)  |
| C10 | C11 | C18 | 115.0(4) | C28 | C19 | C14 | 112.1(8)  |
| C8  | C3  | N1  | 120.4(4) | C28 | C19 | C29 | 111.6(7)  |
| C4  | C3  | N1  | 120.8(4) | C28 | C19 | C29 | 111.6(7)  |
| C4  | C3  | C8  | 118.8(4) | C28 | C19 | C30 | 52.9(10)  |
| N1  | C2  | C9  | 122.2(3) | C31 | C19 | C14 | 118.9(10) |
| N1  | C2  | C1  | 121.3(4) | C31 | C19 | C30 | 107.7(10) |
| C1  | C2  | C9  | 116.5(4) | C30 | C19 | C30 | 105(2)    |
| C17 | C16 | C20 | 122.6(4) | C27 | C26 | C25 | 108.5(7)  |
| C17 | C16 | C15 | 115.3(4) | O3  | C26 | C27 | 114.2(5)  |
| C15 | C16 | C20 | 122.1(4) | O3  | C26 | C25 | 137.3(7)  |
| F5  | C27 | C26 | 106.6(7) | C23 | C24 | C25 | 107.9(7)  |
| F5  | C27 | F6  | 109.6(8) | O4  | C24 | C23 | 114.2(5)  |
| F4  | C27 | F5  | 104.9(7) | O4  | C24 | C25 | 137.9(7)  |
| F4  | C27 | C26 | 111.4(6) | C3  | C4  | C5  | 120.0(5)  |

Table S3. Bond lengths [ $\text{\AA}$ ] and valence angles [rad] for **4b**·TPDO.

| Atom | Atom | Distance, $\text{\AA}$ | Atom | Atom | Distance, $\text{\AA}$ | Atom | Atom | Distance, $\text{\AA}$ |
|------|------|------------------------|------|------|------------------------|------|------|------------------------|
| Zn1A | O3A  | 2.057(5)               | C4A  | C9A  | 1.398(4)               | C32B | F8B  | 1.36(3)                |
| Zn1A | O4A  | 2.052(6)               | C5A  | C6A  | 1.391(5)               | C32B | F9B  | 1.29(2)                |
| Zn1A | O5A  | 2.046(5)               | C5A  | C19A | 1.539(5)               | C33B | C34B | 1.38(3)                |
| Zn1A | O6A  | 2.034(5)               | C6A  | C7A  | 1.405(5)               | C34B | C35B | 1.39(3)                |
| Zn1A | N1A  | 1.979(3)               | C7A  | C8A  | 1.384(5)               | C36B | F1B  | 1.35(2)                |
| O3A  | C28A | 1.250(9)               | C7A  | C23A | 1.538(4)               | C36B | F2B  | 1.51(2)                |
| O4A  | C30A | 1.243(9)               | C8A  | C9A  | 1.413(4)               | C36B | F3B  | 1.50(3)                |
| O5A  | C33A | 1.242(8)               | C10A | C11A | 1.436(4)               | C11B | C16B | 1.740(4)               |
| O6A  | C35A | 1.247(9)               | C11A | C12A | 1.345(5)               | O1B  | C3B  | 1.351(4)               |
| C28A | C29A | 1.387(17)              | C13A | C14A | 1.387(5)               | O1B  | C4B  | 1.378(4)               |
| C28A | C27A | 1.490(9)               | C13A | C18A | 1.383(5)               | O2B  | C12B | 1.379(4)               |
| C29A | C30A | 1.406(18)              | C14A | C15A | 1.396(5)               | O2B  | C13B | 1.375(4)               |
| C30A | C31A | 1.594(11)              | C15A | C16A | 1.378(6)               | N1B  | C1B  | 1.328(4)               |
| C31A | F4A  | 1.356(12)              | C16A | C17A | 1.383(5)               | N1B  | C18B | 1.392(5)               |
| C31A | F5A  | 1.315(15)              | C17A | C18A | 1.401(5)               | N2B  | C9B  | 1.388(5)               |

|      |      |           |            |      |           |      |          |          |
|------|------|-----------|------------|------|-----------|------|----------|----------|
| C31A | F6A  | 1.224(11) | C19A       | C20A | 1.550(8)  | N2B  | C10B     | 1.314(4) |
| C32A | C33A | 1.551(12) | C19A       | C21A | 1.526(8)  | C1B  | C2B      | 1.417(5) |
| C32A | F7A  | 1.317(13) | C19A       | C22A | 1.536(5)  | C1B  | C12B     | 1.454(5) |
| C32A | F8A  | 1.327(14) | C23A       | C24A | 1.530(5)  | C2B  | C3B      | 1.368(5) |
| C32A | F9A  | 1.370(14) | C23A       | C25A | 1.487(9)  | C3B  | C10B     | 1.451(4) |
| C33A | C34A | 1.397(17) | C23A       | C26A | 1.585(8)  | C4B  | C5B      | 1.399(5) |
| C34A | C35A | 1.420(16) | C27A       | C35B | 1.541(14) | C4B  | C9B      | 1.407(5) |
| C35A | C36A | 1.564(11) | C27A       | F10B | 1.370(12) | C5B  | C6B      | 1.394(5) |
| C36A | F10A | 1.220(13) | C27A       | F11B | 1.410(11) | C5B  | C19B     | 1.534(4) |
| C36A | F11A | 1.401(13) | C27A       | F12B | 1.358(8)  | C6B  | C7B      | 1.419(5) |
| C36A | F12A | 1.304(11) | Zn1B       | O3B  | 2.047(11) | C7B  | C8B      | 1.376(5) |
| F1A  | C27A | 1.281(7)  | Zn1B       | O4B  | 2.037(12) | C7B  | C23B     | 1.533(5) |
| F2A  | C27A | 1.285(8)  | Zn1B       | O5B  | 2.029(12) | C8B  | C9B      | 1.402(4) |
| F3A  | C27A | 1.359(8)  | Zn1B       | O6B  | 1.994(11) | C10B | C11B     | 1.415(5) |
| C11A | C16A | 1.736(4)  | Zn1B       | N1B  | 1.896(3)  | C11B | C12B     | 1.354(4) |
| O1A  | C3A  | 1.355(4)  | O3B        | C28B | 1.28(2)   | C13B | C14B     | 1.379(5) |
| O1A  | C4A  | 1.375(4)  | O4B        | C30B | 1.288(19) | C13B | C18B     | 1.407(5) |
| O2A  | C12A | 1.367(4)  | O5B        | C33B | 1.262(16) | C14B | C15B     | 1.393(5) |
| O2A  | C13A | 1.382(4)  | O6B        | C35B | 1.278(17) | C15B | C16B     | 1.391(6) |
| N1A  | C1A  | 1.315(4)  | C28B       | C29B | 1.35(4)   | C16B | C17B     | 1.385(6) |
| N1A  | C18A | 1.410(4)  | C28B       | C36B | 1.26(3)   | C17B | C18B     | 1.395(5) |
| N2A  | C9A  | 1.387(4)  | C29B       | C30B | 1.44(4)   | C19B | C20B     | 1.521(9) |
| N2A  | C10A | 1.315(4)  | C30B       | C31B | 1.40(3)   | C19B | C21B     | 1.524(6) |
| C1A  | C2A  | 1.419(5)  | C31B       | F4B  | 1.46(4)   | C19B | C22B     | 1.542(8) |
| C1A  | C12A | 1.460(5)  | C31B       | F5B  | 1.39(3)   | C23B | C24B     | 1.581(9) |
| C2A  | C3A  | 1.350(4)  | C31B       | F6B  | 1.30(3)   | C23B | C25B     | 1.488(8) |
| C3A  | C10A | 1.451(4)  | C32B       | C33B | 1.42(2)   | C23B | C26B     | 1.535(5) |
| C4A  | C5A  | 1.401(5)  | C32B       | F7B  | 1.57(2)   |      |          |          |
| Atom | Atom | Atom      | Angle, °   | Atom | Atom      | Atom | Angle, ° |          |
| O4A  | Zn1A | O3A       | 86.8(2)    | F10B | C27A      | C35B | 102.7(7) |          |
| O5A  | Zn1A | O3A       | 151.4(2)   | F10B | C27A      | F11B | 102.9(7) |          |
| O5A  | Zn1A | O4A       | 85.10(12)  | F11B | C27A      | C35B | 110.0(7) |          |
| O6A  | Zn1A | O3A       | 86.61(12)  | F12B | C27A      | C35B | 113.3(7) |          |
| O6A  | Zn1A | O4A       | 150.0(2)   | F12B | C27A      | F10B | 130.4(7) |          |
| O6A  | Zn1A | O5A       | 86.8(2)    | F12B | C27A      | F11B | 95.8(8)  |          |
| N1A  | Zn1A | O3A       | 103.1(2)   | O4B  | Zn1B      | O3B  | 86.9(5)  |          |
| N1A  | Zn1A | O4A       | 105.7(2)   | O5B  | Zn1B      | O3B  | 151.3(4) |          |
| N1A  | Zn1A | O5A       | 105.49(19) | O5B  | Zn1B      | O4B  | 84.6(3)  |          |
| N1A  | Zn1A | O6A       | 104.3(2)   | O6B  | Zn1B      | O3B  | 86.5(3)  |          |
| C28A | O3A  | Zn1A      | 126.6(5)   | O6B  | Zn1B      | O4B  | 149.9(5) |          |
| C30A | O4A  | Zn1A      | 126.7(5)   | O6B  | Zn1B      | O5B  | 87.3(5)  |          |
| C33A | O5A  | Zn1A      | 127.9(5)   | N1B  | Zn1B      | O3B  | 102.4(3) |          |
| C35A | O6A  | Zn1A      | 127.4(5)   | N1B  | Zn1B      | O4B  | 107.9(4) |          |
| O3A  | C28A | C29A      | 128.7(9)   | N1B  | Zn1B      | O5B  | 106.3(3) |          |

|      |      |      |           |      |      |      |           |
|------|------|------|-----------|------|------|------|-----------|
| O3A  | C28A | C27A | 111.9(7)  | N1B  | Zn1B | O6B  | 102.2(4)  |
| C29A | C28A | C27A | 118.9(8)  | C28B | O3B  | Zn1B | 127.6(11) |
| C28A | C29A | C30A | 120.9(11) | C30B | O4B  | Zn1B | 125.2(11) |
| O4A  | C30A | C29A | 128.5(9)  | C33B | O5B  | Zn1B | 128.1(10) |
| O4A  | C30A | C31A | 111.0(7)  | C35B | O6B  | Zn1B | 127.7(10) |
| C29A | C30A | C31A | 120.2(8)  | O3B  | C28B | C29B | 129(2)    |
| F4A  | C31A | C30A | 108.1(7)  | C36B | C28B | O3B  | 110.7(18) |
| F5A  | C31A | C30A | 109.8(9)  | C36B | C28B | C29B | 120(3)    |
| F5A  | C31A | F4A  | 96.6(9)   | C28B | C29B | C30B | 119(3)    |
| F6A  | C31A | C30A | 115.0(8)  | O4B  | C30B | C29B | 130(2)    |
| F6A  | C31A | F4A  | 113.7(7)  | O4B  | C30B | C31B | 107.0(19) |
| F6A  | C31A | F5A  | 112.1(10) | C31B | C30B | C29B | 123(2)    |
| F7A  | C32A | C33A | 110.3(9)  | C30B | C31B | F4B  | 115(2)    |
| F7A  | C32A | F8A  | 113.1(8)  | F5B  | C31B | C30B | 117(3)    |
| F7A  | C32A | F9A  | 106.3(9)  | F5B  | C31B | F4B  | 82(2)     |
| F8A  | C32A | C33A | 111.6(10) | F6B  | C31B | C30B | 129(3)    |
| F8A  | C32A | F9A  | 106.0(11) | F6B  | C31B | F4B  | 103(2)    |
| F9A  | C32A | C33A | 109.2(7)  | F6B  | C31B | F5B  | 101(2)    |
| O5A  | C33A | C32A | 114.4(8)  | C33B | C32B | F7B  | 104.6(15) |
| O5A  | C33A | C34A | 128.3(9)  | F8B  | C32B | C33B | 118.9(18) |
| C34A | C33A | C32A | 116.9(10) | F8B  | C32B | F7B  | 103.0(17) |
| C33A | C34A | C35A | 119.9(14) | F9B  | C32B | C33B | 123.4(18) |
| O6A  | C35A | C34A | 128.6(10) | F9B  | C32B | F7B  | 96.2(13)  |
| O6A  | C35A | C36A | 110.4(7)  | F9B  | C32B | F8B  | 106.1(18) |
| C34A | C35A | C36A | 120.9(10) | O5B  | C33B | C32B | 123.8(15) |
| F10A | C36A | C35A | 115.9(9)  | O5B  | C33B | C34B | 125.7(18) |
| F10A | C36A | F11A | 105.2(10) | C34B | C33B | C32B | 110.2(18) |
| F10A | C36A | F12A | 114.4(7)  | C33B | C34B | C35B | 123(2)    |
| F11A | C36A | C35A | 107.6(6)  | O6B  | C35B | C27A | 110.5(11) |
| F12A | C36A | C35A | 111.6(8)  | O6B  | C35B | C34B | 126.5(18) |
| F12A | C36A | F11A | 100.4(8)  | C34B | C35B | C27A | 123.0(16) |
| C3A  | O1A  | C4A  | 119.8(3)  | C28B | C36B | F1B  | 126(2)    |
| C12A | O2A  | C13A | 118.4(3)  | C28B | C36B | F2B  | 115.0(18) |
| C1A  | N1A  | Zn1A | 122.4(2)  | C28B | C36B | F3B  | 117.7(19) |
| C1A  | N1A  | C18A | 117.4(3)  | F1B  | C36B | F2B  | 102.6(14) |
| C18A | N1A  | Zn1A | 120.2(2)  | F1B  | C36B | F3B  | 101.3(17) |
| C10A | N2A  | C9A  | 116.3(3)  | F3B  | C36B | F2B  | 86.8(16)  |
| N1A  | C1A  | C2A  | 121.3(3)  | C3B  | O1B  | C4B  | 119.5(3)  |
| N1A  | C1A  | C12A | 122.3(3)  | C13B | O2B  | C12B | 118.2(3)  |
| C2A  | C1A  | C12A | 116.3(3)  | C1B  | N1B  | Zn1B | 125.4(3)  |
| C3A  | C2A  | C1A  | 120.8(3)  | C1B  | N1B  | C18B | 117.1(3)  |
| O1A  | C3A  | C10A | 118.3(3)  | C18B | N1B  | Zn1B | 117.4(2)  |
| C2A  | C3A  | O1A  | 118.3(3)  | C10B | N2B  | C9B  | 117.1(3)  |
| C2A  | C3A  | C10A | 123.4(3)  | N1B  | C1B  | C2B  | 120.3(3)  |



|      |      |      |          |      |      |      |          |
|------|------|------|----------|------|------|------|----------|
| O1A  | C4A  | C5A  | 117.8(3) | N1B  | C1B  | C12B | 123.0(3) |
| O1A  | C4A  | C9A  | 119.2(3) | C2B  | C1B  | C12B | 116.8(3) |
| C9A  | C4A  | C5A  | 122.9(3) | C3B  | C2B  | C1B  | 120.4(3) |
| C4A  | C5A  | C19A | 121.7(3) | O1B  | C3B  | C2B  | 118.2(3) |
| C6A  | C5A  | C4A  | 115.3(3) | O1B  | C3B  | C10B | 119.3(3) |
| C6A  | C5A  | C19A | 122.9(3) | C2B  | C3B  | C10B | 122.5(3) |
| C5A  | C6A  | C7A  | 124.5(3) | O1B  | C4B  | C5B  | 117.7(3) |
| C6A  | C7A  | C23A | 119.4(3) | O1B  | C4B  | C9B  | 119.1(3) |
| C8A  | C7A  | C6A  | 118.0(3) | C5B  | C4B  | C9B  | 123.1(3) |
| C8A  | C7A  | C23A | 122.6(3) | C4B  | C5B  | C19B | 122.1(3) |
| C7A  | C8A  | C9A  | 120.3(3) | C6B  | C5B  | C4B  | 115.1(3) |
| N2A  | C9A  | C4A  | 122.7(3) | C6B  | C5B  | C19B | 122.8(3) |
| N2A  | C9A  | C8A  | 118.3(3) | C5B  | C6B  | C7B  | 124.3(3) |
| C4A  | C9A  | C8A  | 118.9(3) | C6B  | C7B  | C23B | 118.7(3) |
| N2A  | C10A | C3A  | 123.5(3) | C8B  | C7B  | C6B  | 117.6(3) |
| N2A  | C10A | C11A | 120.8(3) | C8B  | C7B  | C23B | 123.7(3) |
| C11A | C10A | C3A  | 115.6(3) | C7B  | C8B  | C9B  | 121.2(3) |
| C12A | C11A | C10A | 121.1(3) | N2B  | C9B  | C4B  | 122.4(3) |
| O2A  | C12A | C1A  | 119.3(3) | N2B  | C9B  | C8B  | 119.0(3) |
| C11A | C12A | O2A  | 118.0(3) | C8B  | C9B  | C4B  | 118.7(3) |
| C11A | C12A | C1A  | 122.7(3) | N2B  | C10B | C3B  | 122.5(3) |
| O2A  | C13A | C14A | 117.0(3) | N2B  | C10B | C11B | 120.6(3) |
| O2A  | C13A | C18A | 121.0(3) | C11B | C10B | C3B  | 116.9(3) |
| C18A | C13A | C14A | 122.0(3) | C12B | C11B | C10B | 120.7(3) |
| C13A | C14A | C15A | 119.1(4) | O2B  | C12B | C1B  | 119.0(3) |
| C16A | C15A | C14A | 118.7(3) | C11B | C12B | O2B  | 118.2(3) |
| C15A | C16A | C11A | 119.4(3) | C11B | C12B | C1B  | 122.7(3) |
| C15A | C16A | C17A | 122.5(3) | O2B  | C13B | C14B | 117.6(3) |
| C17A | C16A | C11A | 118.1(3) | O2B  | C13B | C18B | 121.1(3) |
| C16A | C17A | C18A | 118.9(4) | C14B | C13B | C18B | 121.3(3) |
| C13A | C18A | N1A  | 121.6(3) | C13B | C14B | C15B | 120.0(4) |
| C13A | C18A | C17A | 118.7(3) | C16B | C15B | C14B | 118.5(4) |
| C17A | C18A | N1A  | 119.7(3) | C15B | C16B | C11B | 119.8(3) |
| C5A  | C19A | C20A | 111.0(5) | C17B | C16B | C11B | 118.0(3) |
| C21A | C19A | C5A  | 110.5(5) | C17B | C16B | C15B | 122.1(3) |
| C21A | C19A | C20A | 109.4(3) | C16B | C17B | C18B | 119.4(4) |
| C21A | C19A | C22A | 106.6(6) | N1B  | C18B | C13B | 121.6(3) |
| C22A | C19A | C5A  | 111.4(3) | N1B  | C18B | C17B | 119.8(3) |
| C22A | C19A | C20A | 107.7(6) | C17B | C18B | C13B | 118.6(4) |
| C7A  | C23A | C26A | 107.5(5) | C5B  | C19B | C22B | 110.1(5) |
| C24A | C23A | C7A  | 112.0(3) | C20B | C19B | C5B  | 109.8(5) |
| C24A | C23A | C26A | 107.5(5) | C20B | C19B | C21B | 108.0(6) |
| C25A | C23A | C7A  | 110.6(5) | C20B | C19B | C22B | 110.7(3) |
| C25A | C23A | C24A | 110.2(5) | C21B | C19B | C5B  | 110.9(3) |

|      |      |      |          |      |      |      |          |
|------|------|------|----------|------|------|------|----------|
| C25A | C23A | C26A | 108.8(3) | C21B | C19B | C22B | 107.5(6) |
| F1A  | C27A | C28A | 115.9(5) | C7B  | C23B | C24B | 107.8(5) |
| F1A  | C27A | F2A  | 95.0(5)  | C7B  | C23B | C26B | 111.6(3) |
| F1A  | C27A | F3A  | 109.9(5) | C25B | C23B | C7B  | 111.1(5) |
| F2A  | C27A | C28A | 114.8(5) | C25B | C23B | C24B | 109.3(3) |
| F2A  | C27A | F3A  | 106.5(5) | C25B | C23B | C26B | 109.7(5) |
| F3A  | C27A | C28A | 113.1(5) | C26B | C23B | C24B | 107.3(5) |

Table S4. Bond lengths [ $\text{\AA}$ ] and valence angles [rad] for **5d**.

| Atom | Atom | Distance, $\text{\AA}$ |                   | Atom | Atom | Distance, $\text{\AA}$ |                   |
|------|------|------------------------|-------------------|------|------|------------------------|-------------------|
| Zn1  | O4   | 2.0407(11)             |                   | C21  | C22  | 1.536(2)               |                   |
| Zn1  | O3   | 2.0369(11)             |                   | C21  | C20  | 1.390(2)               |                   |
| Zn1  | O2   | 2.0314(11)             |                   | C4   | C9   | 1.399(2)               |                   |
| Zn1  | O5   | 2.0363(11)             |                   | C4   | C5   | 1.398(2)               |                   |
| Zn1  | N1   | 2.0831(12)             |                   | C3   | C2   | 1.357(2)               |                   |
| F5   | C22  | 1.3370(19)             |                   | C3   | C1   | 1.427(2)               |                   |
| F4   | C22  | 1.3355(19)             |                   | C2   | C1   | 1.450(2)               |                   |
| F6   | C22  | 1.3334(18)             |                   | C9   | C8   | 1.397(2)               |                   |
| O1   | C4   | 1.3787(17)             |                   | C5   | C6   | 1.398(2)               |                   |
| O1   | C2   | 1.3532(17)             |                   | C5   | C10  | 1.537(2)               |                   |
| O4   | C26  | 1.2546(19)             |                   | C7   | C14  | 1.542(2)               |                   |
| O3   | C21  | 1.2580(19)             |                   | C7   | C8   | 1.380(2)               |                   |
| F7   | C27  | 1.319(2)               |                   | C7   | C6   | 1.401(2)               |                   |
| O2   | C19  | 1.2551(19)             |                   | C14  | C16  | 1.521(2)               |                   |
| F8   | C27  | 1.331(2)               |                   | C14  | C17  | 1.538(2)               |                   |
| F10  | C23  | 1.3335(19)             |                   | C14  | C15  | 1.534(2)               |                   |
| O5   | C24  | 1.2551(19)             |                   | C26  | C27  | 1.542(2)               |                   |
| F1   | C18  | 1.321(2)               |                   | C26  | C25  | 1.390(2)               |                   |
| F9   | C27  | 1.336(2)               |                   | C20  | C19  | 1.389(2)               |                   |
| F12  | C23  | 1.336(2)               |                   | C24  | C25  | 1.392(2)               |                   |
| F2   | C18  | 1.330(2)               |                   | C24  | C23  | 1.538(2)               |                   |
| F11  | C23  | 1.313(2)               |                   | C19  | C18  | 1.536(2)               |                   |
| F3   | C18  | 1.331(2)               |                   | C10  | C13  | 1.538(2)               |                   |
| N1   | C1   | 1.3257(19)             |                   | C10  | C12  | 1.541(3)               |                   |
| N1   | C9   | 1.4000(18)             |                   | C10  | C11  | 1.537(3)               |                   |
| Atom | Atom | Atom                   | Angle, $^{\circ}$ | Atom | Atom | Atom                   | Angle, $^{\circ}$ |
| O4   | Zn1  | N1                     | 110.95(5)         | C15  | C14  | C17                    | 109.77(16)        |
| O3   | Zn1  | O4                     | 86.94(4)          | F5   | C22  | C21                    | 113.10(13)        |
| O3   | Zn1  | N1                     | 101.99(5)         | F4   | C22  | F5                     | 107.42(13)        |
| O2   | Zn1  | O4                     | 145.35(4)         | F4   | C22  | C21                    | 111.23(12)        |
| O2   | Zn1  | O3                     | 87.48(4)          | F6   | C22  | F5                     | 107.34(12)        |
| O2   | Zn1  | O5                     | 84.49(5)          | F6   | C22  | F4                     | 107.44(13)        |

|     |     |     |            |     |     |     |            |
|-----|-----|-----|------------|-----|-----|-----|------------|
| O2  | Zn1 | N1  | 103.66(5)  | F6  | C22 | C21 | 110.06(13) |
| O5  | Zn1 | O4  | 87.08(4)   | O4  | C26 | C27 | 114.26(14) |
| O5  | Zn1 | O3  | 156.26(5)  | O4  | C26 | C25 | 128.75(15) |
| O5  | Zn1 | N1  | 101.61(5)  | C25 | C26 | C27 | 116.95(14) |
| C2  | O1  | C4  | 120.08(11) | C19 | C20 | C21 | 121.13(14) |
| C26 | O4  | Zn1 | 127.23(10) | O5  | C24 | C25 | 128.14(15) |
| C21 | O3  | Zn1 | 126.39(10) | O5  | C24 | C23 | 113.88(14) |
| C19 | O2  | Zn1 | 126.81(10) | C25 | C24 | C23 | 117.92(14) |
| C24 | O5  | Zn1 | 127.83(11) | C7  | C8  | C9  | 120.78(13) |
| C1  | N1  | Zn1 | 122.31(10) | C5  | C6  | C7  | 123.56(14) |
| C1  | N1  | C9  | 118.19(12) | O2  | C19 | C20 | 128.49(14) |
| C9  | N1  | Zn1 | 119.49(9)  | O2  | C19 | C18 | 112.79(14) |
| O3  | C21 | C22 | 113.20(13) | C20 | C19 | C18 | 118.69(14) |
| O3  | C21 | C20 | 128.28(15) | F7  | C27 | F8  | 107.83(15) |
| C20 | C21 | C22 | 118.50(14) | F7  | C27 | F9  | 107.64(14) |
| O1  | C4  | C9  | 119.23(13) | F7  | C27 | C26 | 112.52(13) |
| O1  | C4  | C5  | 118.02(13) | F8  | C27 | F9  | 106.27(14) |
| C5  | C4  | C9  | 122.72(13) | F8  | C27 | C26 | 110.14(13) |
| C2  | C3  | C1  | 120.24(13) | F9  | C27 | C26 | 112.15(14) |
| O1  | C2  | C3  | 117.23(13) | C5  | C10 | C13 | 111.39(13) |
| O1  | C2  | C1  | 119.51(13) | C5  | C10 | C12 | 109.65(14) |
| C3  | C2  | C1  | 123.26(13) | C5  | C10 | C11 | 109.73(14) |
| N1  | C1  | C3  | 122.18(13) | C13 | C10 | C12 | 107.33(15) |
| N1  | C1  | C2  | 121.32(13) | C11 | C10 | C13 | 107.55(14) |
| C3  | C1  | C2  | 116.50(13) | C11 | C10 | C12 | 111.17(15) |
| C4  | C9  | N1  | 121.61(13) | C26 | C25 | C24 | 120.88(14) |
| C8  | C9  | N1  | 119.44(13) | F10 | C23 | F12 | 106.33(14) |
| C8  | C9  | C4  | 118.89(13) | F10 | C23 | C24 | 112.23(14) |
| C4  | C5  | C6  | 115.69(13) | F12 | C23 | C24 | 109.70(13) |
| C4  | C5  | C10 | 122.12(13) | F11 | C23 | F10 | 108.59(15) |
| C6  | C5  | C10 | 122.18(13) | F11 | C23 | F12 | 107.59(15) |
| C8  | C7  | C14 | 119.67(13) | F11 | C23 | C24 | 112.14(14) |
| C8  | C7  | C6  | 118.35(14) | F1  | C18 | F2  | 107.82(15) |
| C6  | C7  | C14 | 121.74(13) | F1  | C18 | F3  | 107.49(16) |
| C16 | C14 | C7  | 112.45(13) | F1  | C18 | C19 | 111.36(14) |
| C16 | C14 | C17 | 109.47(14) | F2  | C18 | F3  | 106.96(15) |
| C16 | C14 | C15 | 109.00(15) | F2  | C18 | C19 | 113.03(15) |
| C17 | C14 | C7  | 105.79(13) | F3  | C18 | C19 | 109.94(14) |
| C15 | C14 | C7  | 110.31(13) |     |     |     |            |

## 2. UV/vis and emission spectra

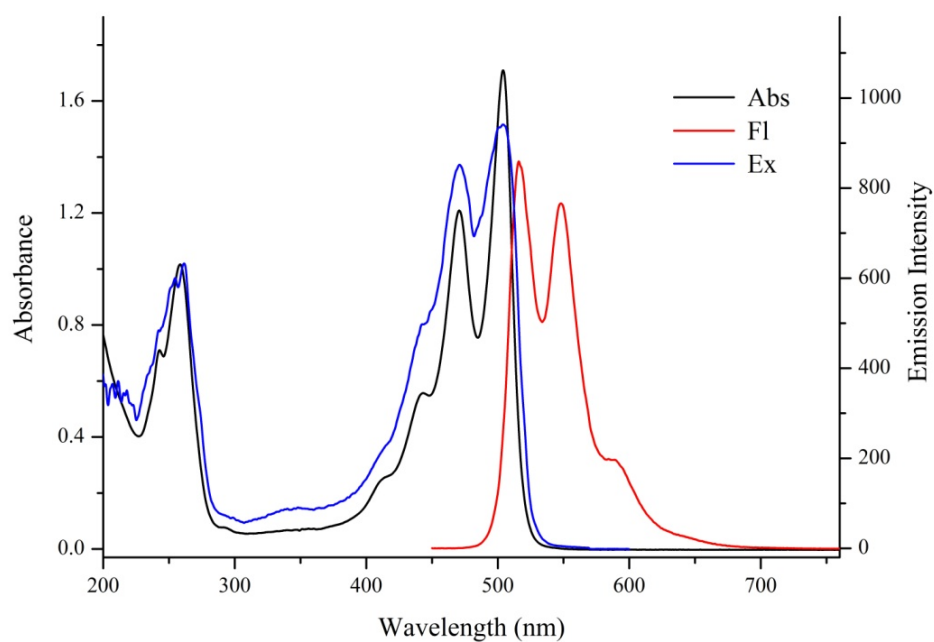

**Figure S3.** UV/vis, fluorescence emission ( $\lambda_{\text{ex}} = 365$  nm) and fluorescence excitation ( $\lambda_{\text{obs}} = 610$  nm) spectra of compound **1a** (heptane,  $C = 1 \cdot 10^{-4}$  M,  $l = 0.2$  cm,  $T = 293$  K).

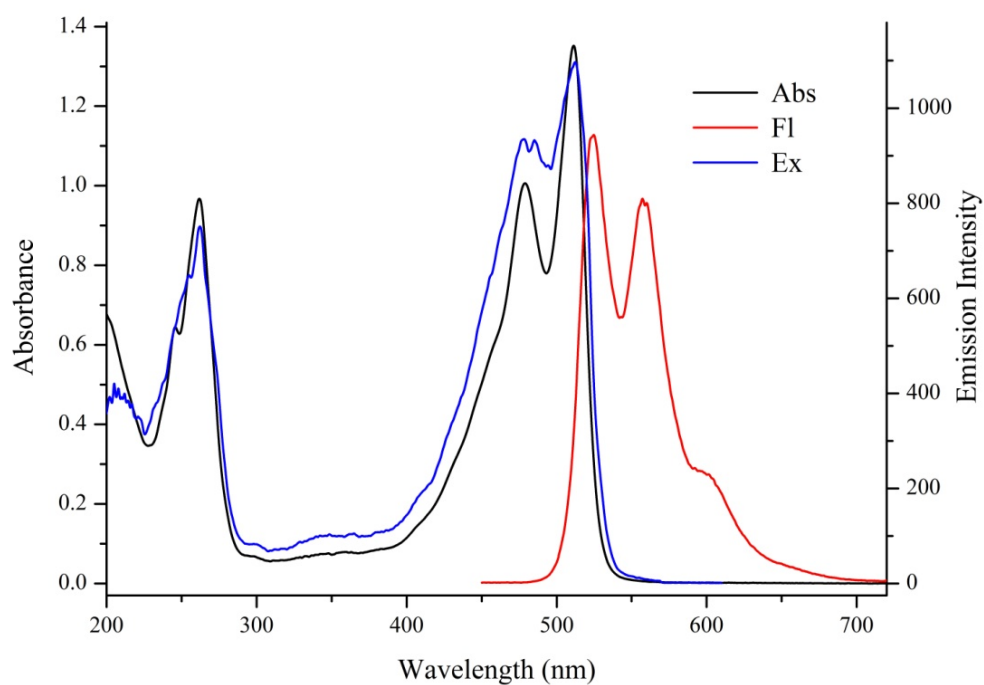

**Figure S4.** UV/vis and fluorescence emission ( $\lambda_{\text{ex}} = 365$  nm) and fluorescence excitation ( $\lambda_{\text{obs}} = 620$  nm) spectra of compound **1b** (heptane,  $C = 1 \cdot 10^{-4}$  M,  $l = 0.2$  cm,  $T = 293$  K).

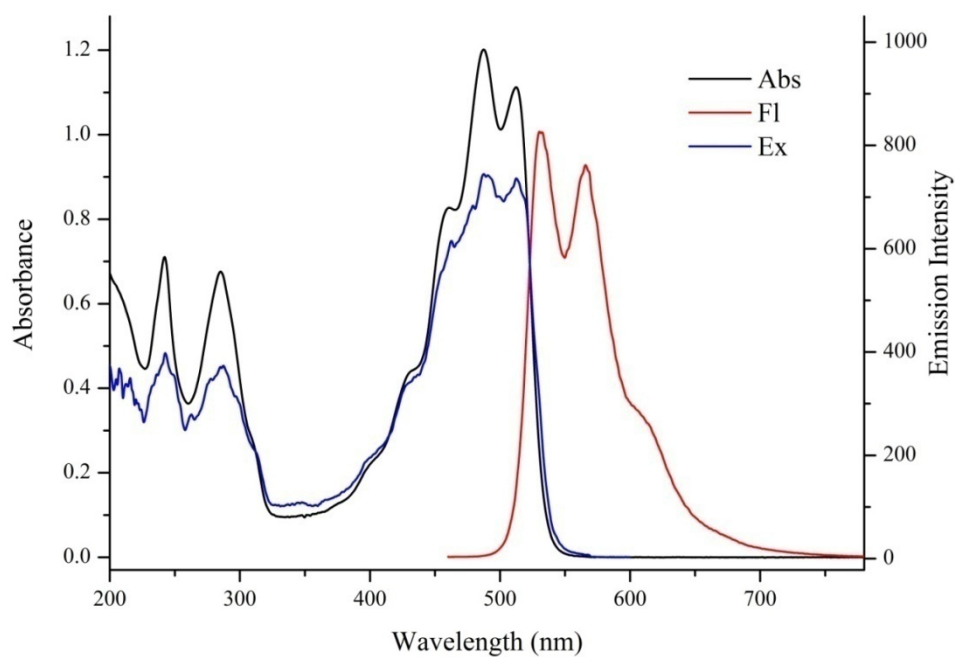

**Figure S5.** UV/vis and fluorescence emission ( $\lambda_{\text{ex}} = 365 \text{ nm}$ ) and fluorescence excitation ( $\lambda_{\text{obs}} = 640 \text{ nm}$ ) spectra of ligand **1c** (heptane,  $C = 1 \cdot 10^{-4} \text{ M}$ ,  $l = 0.2 \text{ cm}$ ,  $T = 293 \text{ K}$ ).

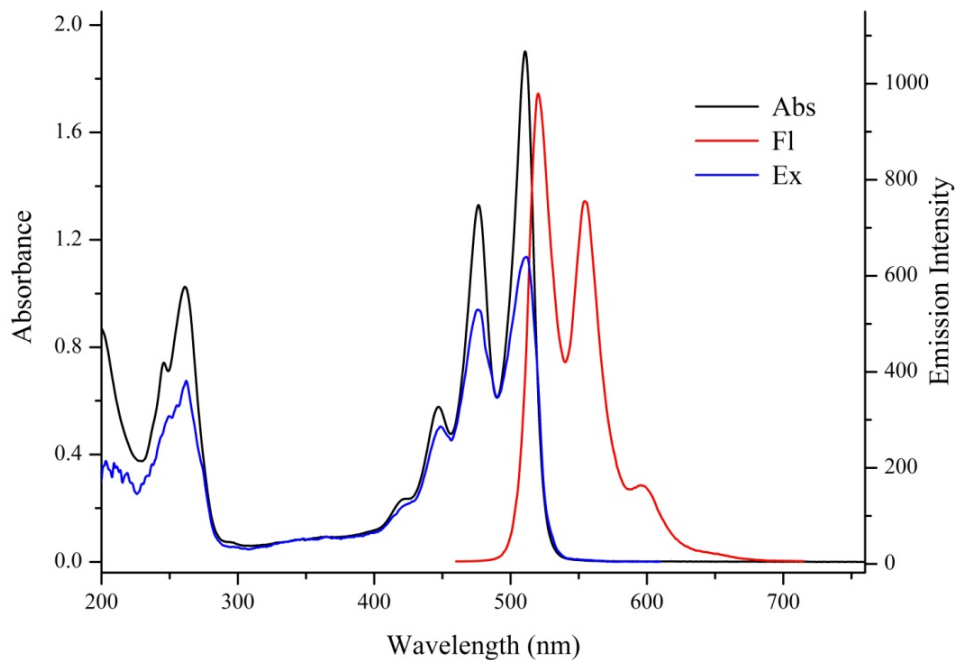

**Figure S6.** UV/vis and fluorescence emission ( $\lambda_{\text{ex}} = 365 \text{ nm}$ ) and fluorescence excitation ( $\lambda_{\text{obs}} = 620 \text{ nm}$ ) spectra of compound **1d** (heptane,  $C = 1 \cdot 10^{-4} \text{ M}$ ,  $l = 0.2 \text{ cm}$ ,  $T = 293 \text{ K}$ ).

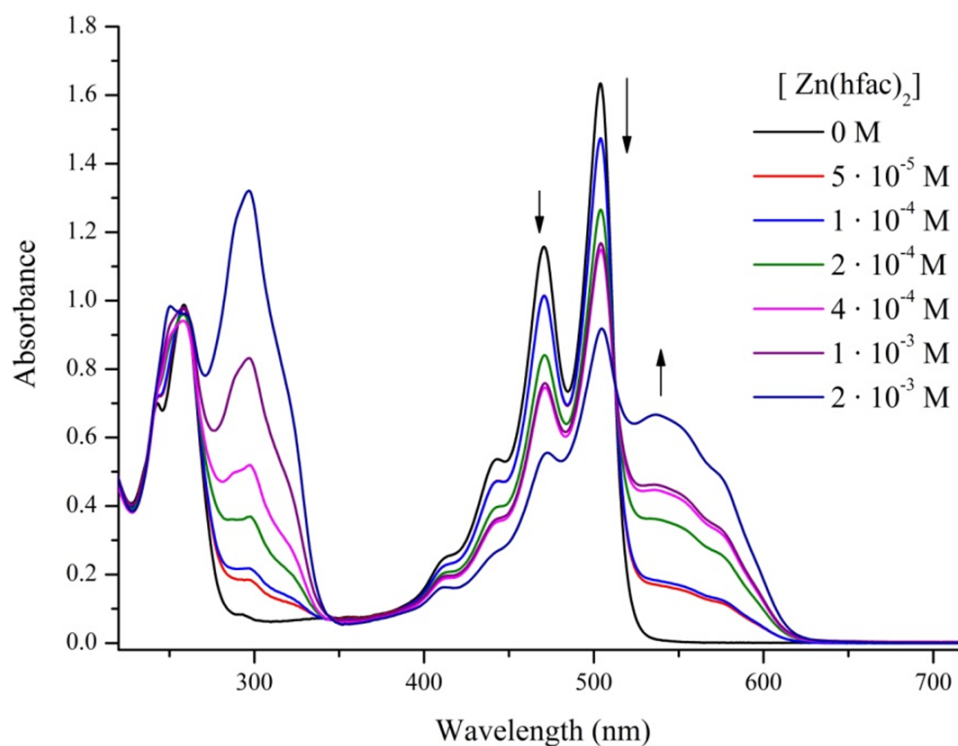

**Figure S7.** Changes in the UV-Vis spectrum of a heptane solution of **1a** ( $C = 1 \cdot 10^{-4} \text{ M}$ ,  $l = 0.2 \text{ cm}$ ,  $T = 293 \text{ K}$ ) under increasing  $\text{Zn}(\text{hfac})_2$  concentration.

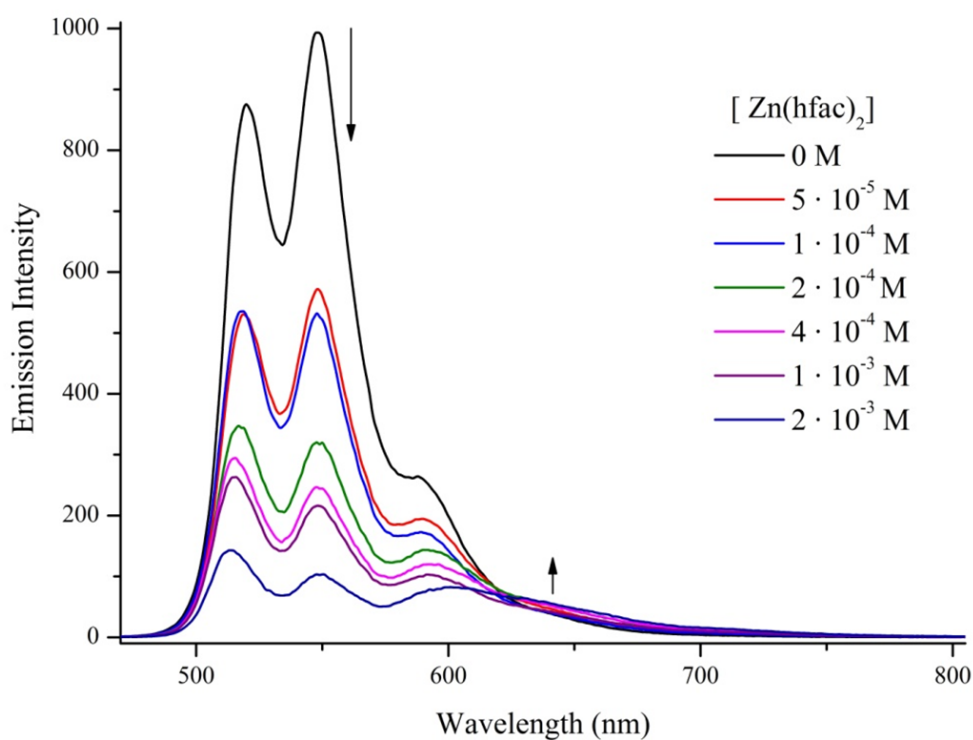

**Figure S8.** Changes in the Fluorescence spectrum ( $\lambda_{\text{ex}} = 410 \text{ nm}$ ) of a heptane solution of **1a** under increasing  $\text{Zn}(\text{hfac})_2$  concentration.

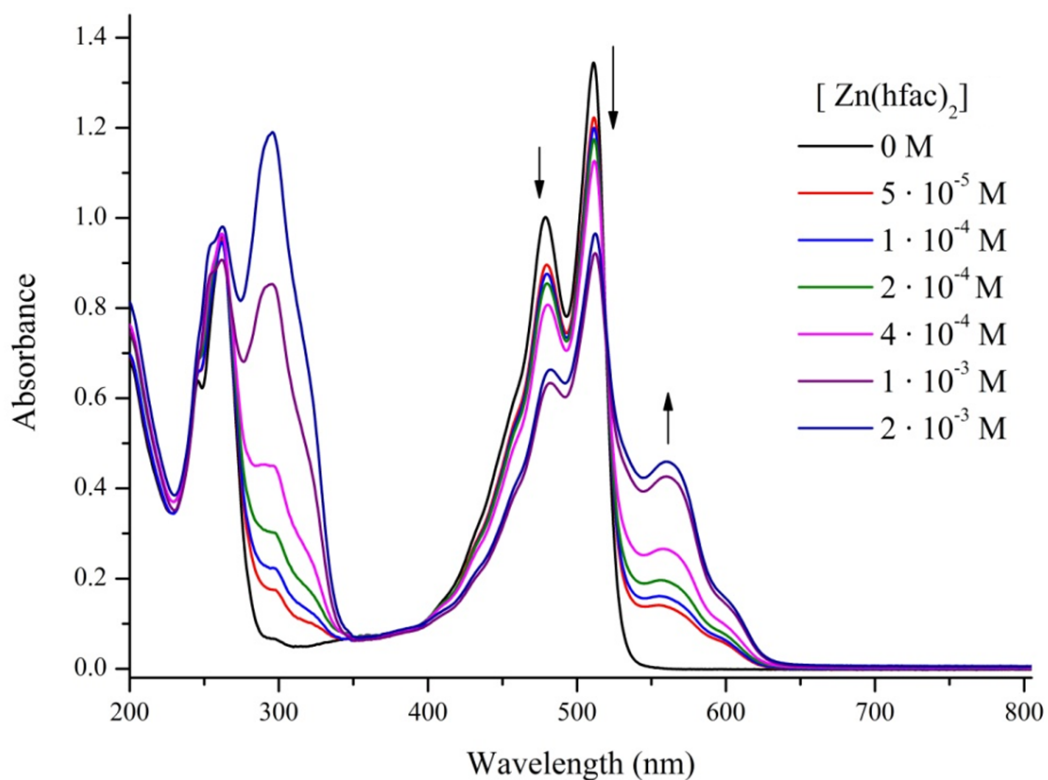

**Figure S9.** Changes in the UV-Vis spectrum of a heptane solution of **1b** ( $C = 1 \cdot 10^{-4}$  M,  $l = 0.2$  cm,  $T = 293$  K) under increasing  $\text{Zn}(\text{hfac})_2$  concentration.

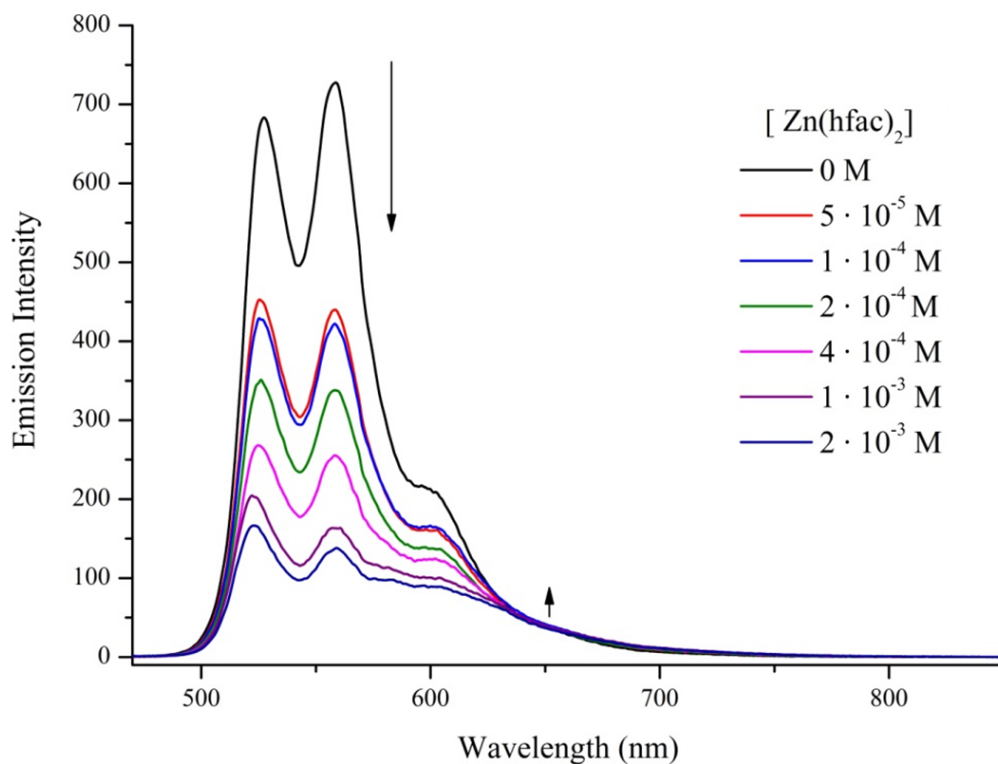

**Figure S10.** Changes in the Fluorescence spectrum ( $\lambda_{\text{ex}} = 410$  nm) of a heptane solution of **1b** under increasing  $\text{Zn}(\text{hfac})_2$  concentration.

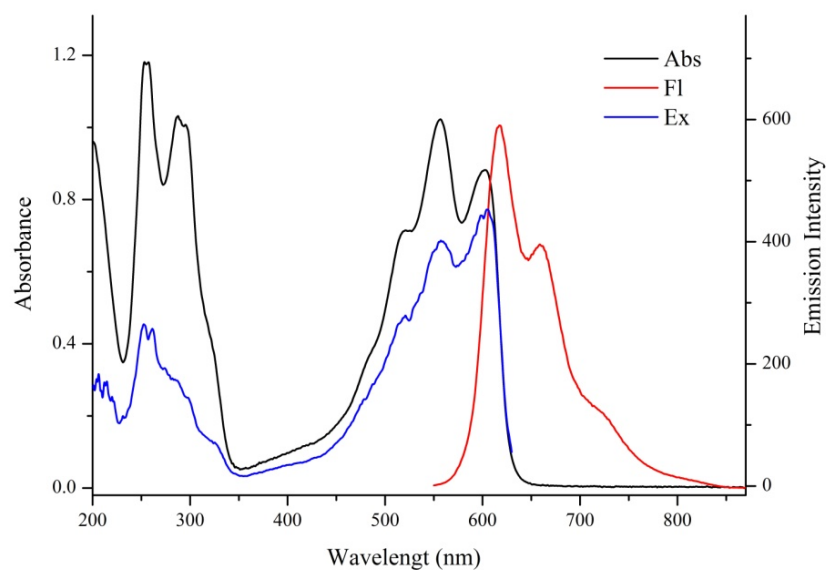

**Figure S11.** UV/vis and fluorescence emission ( $\lambda_{\text{ex}} = 540 \text{ nm}$ ) and fluorescence excitation ( $\lambda_{\text{obs}} = 650 \text{ nm}$ ) spectra of complex **5d** (heptane,  $C = 1 \cdot 10^{-4} \text{ M}$ ,  $l = 0.2 \text{ cm}$ ,  $T = 293 \text{ K}$ ).

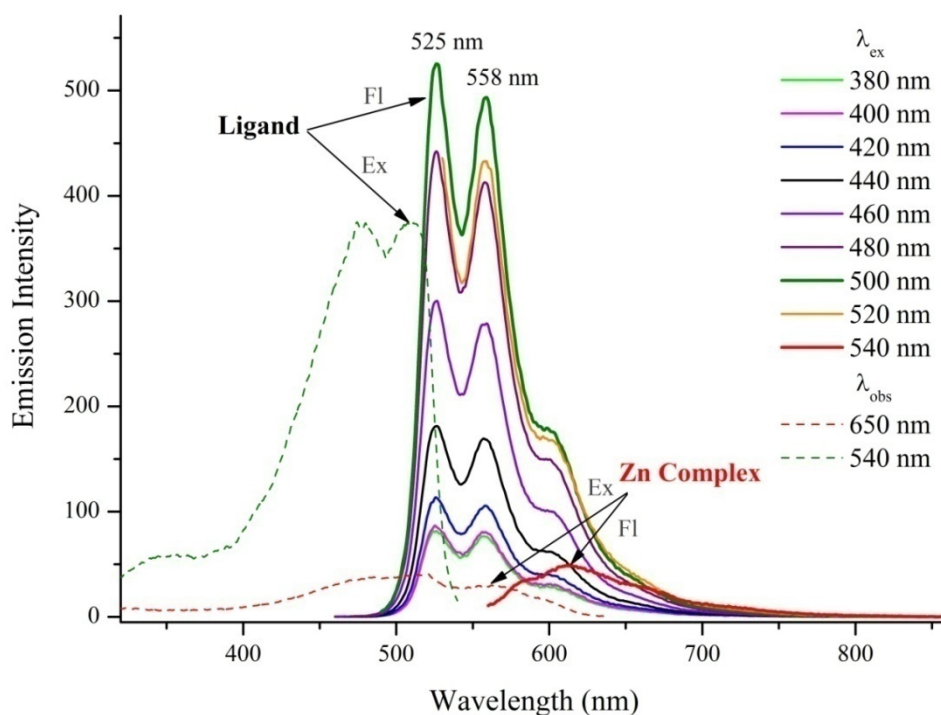

**Figure S12.** Changes in the fluorescence emission (*solid lines*) spectrum of compound  $\text{Zn}(\text{hfacac})_2(\text{TPDO-Cl})_2 \mathbf{4b} \cdot \text{TPDO}$  (heptane,  $C = 1 \cdot 10^{-5} \text{ M}$ ,  $l = 1 \text{ cm}$ ,  $T = 293 \text{ K}$ ) under increasing wavelength of excitation light and fluorescence excitation spectra (*dashed*) of ligand ( $\lambda_{\text{obs}} = 540 \text{ nm}$ ) and of complex ( $\lambda_{\text{obs}} = 650 \text{ nm}$ ).



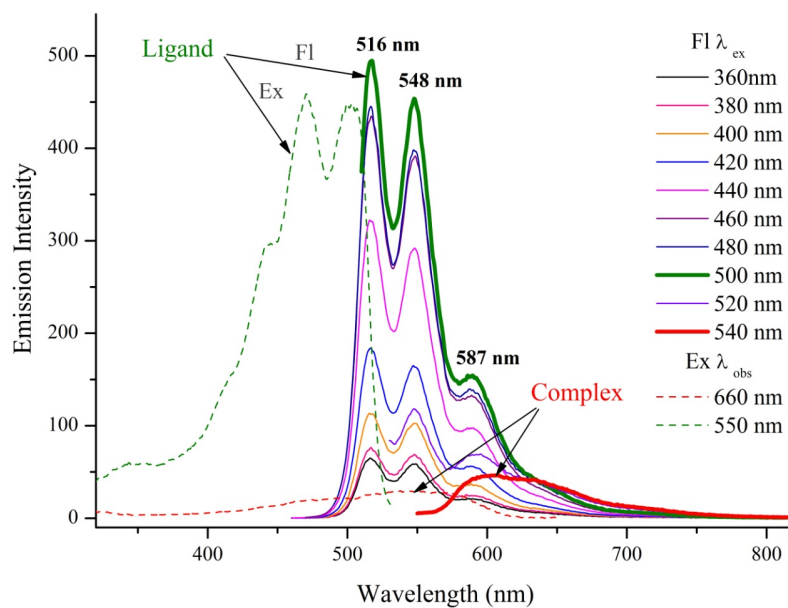

Fig. S13. Changes in the fluorescence emission (*solid lines*) spectrum of a complex  $\text{Zn}(\text{hfac})_2\text{-TPDO}$  (heptane,  $C = 1 \cdot 10^{-5} \text{ M}$ ,  $T = 293 \text{ K}$ ) under increasing wavelength of the exciting light and the fluorescence excitation spectra (*dashed*) of the ligand ( $\lambda_{\text{obs}} = 550 \text{ nm}$ ) and the complex ( $\lambda_{\text{obs}} = 660 \text{ nm}$ ).

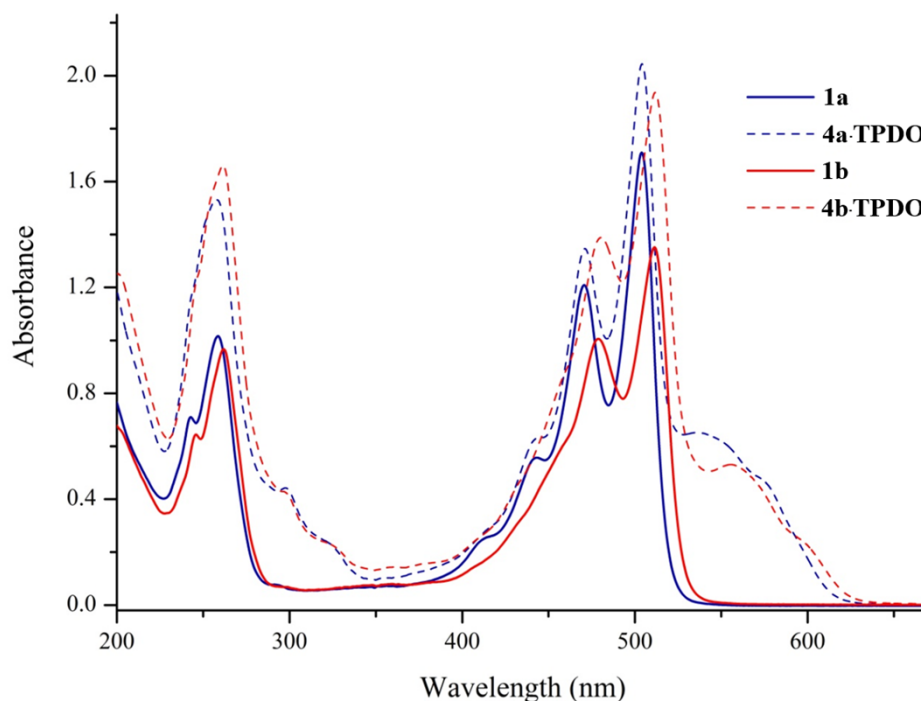

Fig. S14. UV/vis spectra of compounds **1a,b** (*solid lines*) and compounds **4a-TPDO**, **4b-TPDO** (*dashed*) (heptane,  $C = 1 \cdot 10^{-4} \text{ M}$ ,  $l = 0.2 \text{ cm}$ ,  $T = 293 \text{ K}$ ).

### 3. DFT study

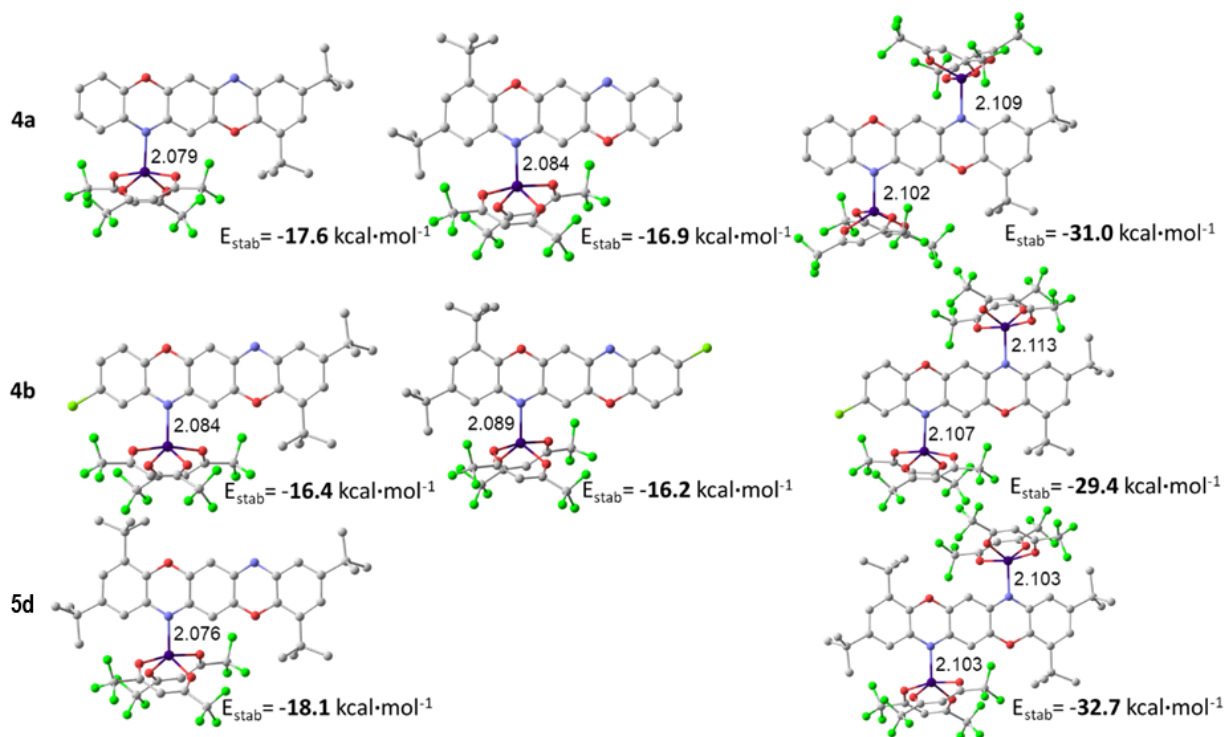

Fig. S15. Stabilization energies (with respect to dissociation into the ligand and  $\text{Zn}(\text{hfac})_2$ ) and selected geometrical parameters of complexes 4 and 5 as calculated by DFT(B3LYP)6-311++G(d,p) method.

### 4. Cyclic voltammetry

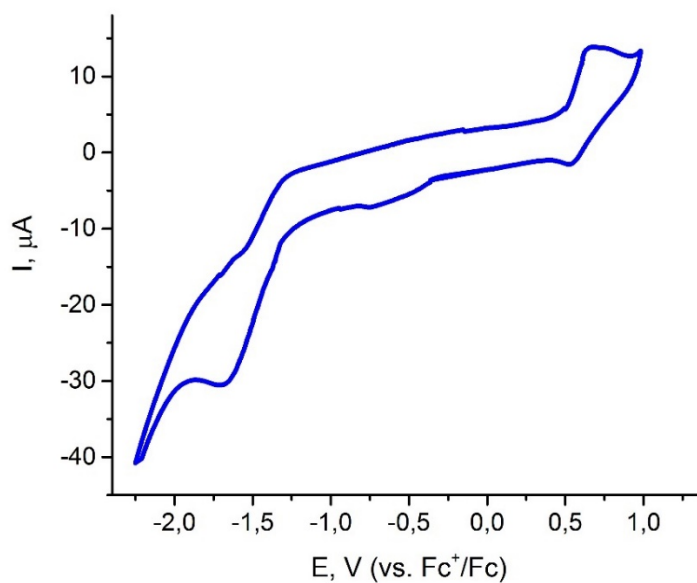

Fig. S16. Cyclic voltammogram of **5d** in dichloromethane solution ( $C = 5 \text{ mM}$ ) at 300 K.  $\text{TBAPF}_6$  supporting electrolyte ( $C = 0.1 \text{ M}$ );  $0.05 \text{ V/s}$ ; GC working electrode. The redox potential data are referenced to the  $\text{Fc}^+/\text{Fc}$  couple.

5.  $^1\text{H}$ ,  $^{13}\text{C}$  NMR spectra.

NMR spectra of (2,4-di-(tert-butyl)-benzo[5,6][1,4]oxazine[2,3-b]phenoxazine)-bis-(1,1,1,5,5,5-hexafluoro-pentane-2,4-dioate) Zn (II) **4a**

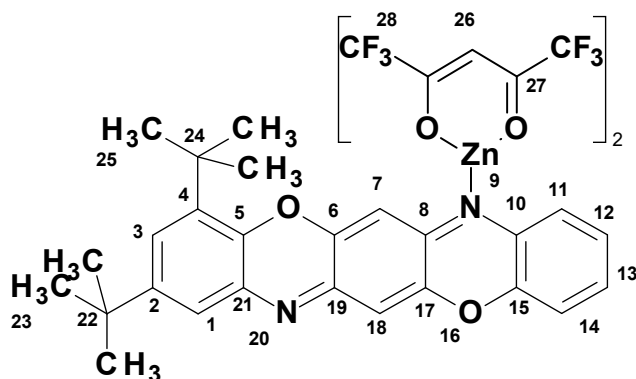

|           |                                   |        |        |        |        |        |        |        |        |        |        |        |        |        |
|-----------|-----------------------------------|--------|--------|--------|--------|--------|--------|--------|--------|--------|--------|--------|--------|--------|
|           | Nuclear                           | 1      | 2      | 3      | 4      | 5      | 6      | 7      | 8      | 10     | 11     | 12     | 13     | 14     |
| <b>4a</b> | $^1\text{H}$                      | 7.64   |        | 7.35   |        |        |        | 6.58   |        |        | 7.55   | 6.79   | 6.74   | 6.64   |
|           | $J_{\text{H-H}}$                  | 2.3    |        | 2.3    |        |        |        |        |        |        | 7.8    | 7.8    | 7.8    | 7.8    |
|           | $^{13}\text{C}/^{15}\text{N}$     | 125.11 | 137.65 | 126.26 | 148.98 | 142.24 | 152.97 | 107.53 | 148.92 | 135.98 | 129.21 | 126.28 | 130.30 | 116.78 |
|           | $J_{^{13}\text{C}-^{19}\text{F}}$ |        |        |        |        |        |        |        |        |        |        |        |        |        |
|           | Nuclear                           | 15     | 17     | 18     | 19     | 21     | 22     | 23     | 24     | 25     | 26     | 27     | 28     |        |
| <b>4a</b> | $^1\text{H}$                      |        |        | 6.65   |        |        |        | 1.41   |        | 1.27   | 6.16   |        |        |        |
|           | $J_{\text{H-H}}$                  |        |        |        |        |        |        |        |        |        |        |        |        |        |
|           | $^{13}\text{C}/^{15}\text{N}$     | 145.82 | 151.59 | 106.58 | 149.42 | 136.37 | 35.74  | 30.99  | 36.08  | 32.23  | 91.34  | 181.76 | 118.87 |        |
|           | $J_{^{13}\text{C}-^{19}\text{F}}$ |        |        |        |        |        |        |        |        |        |        | 34.9   | 285.3  |        |

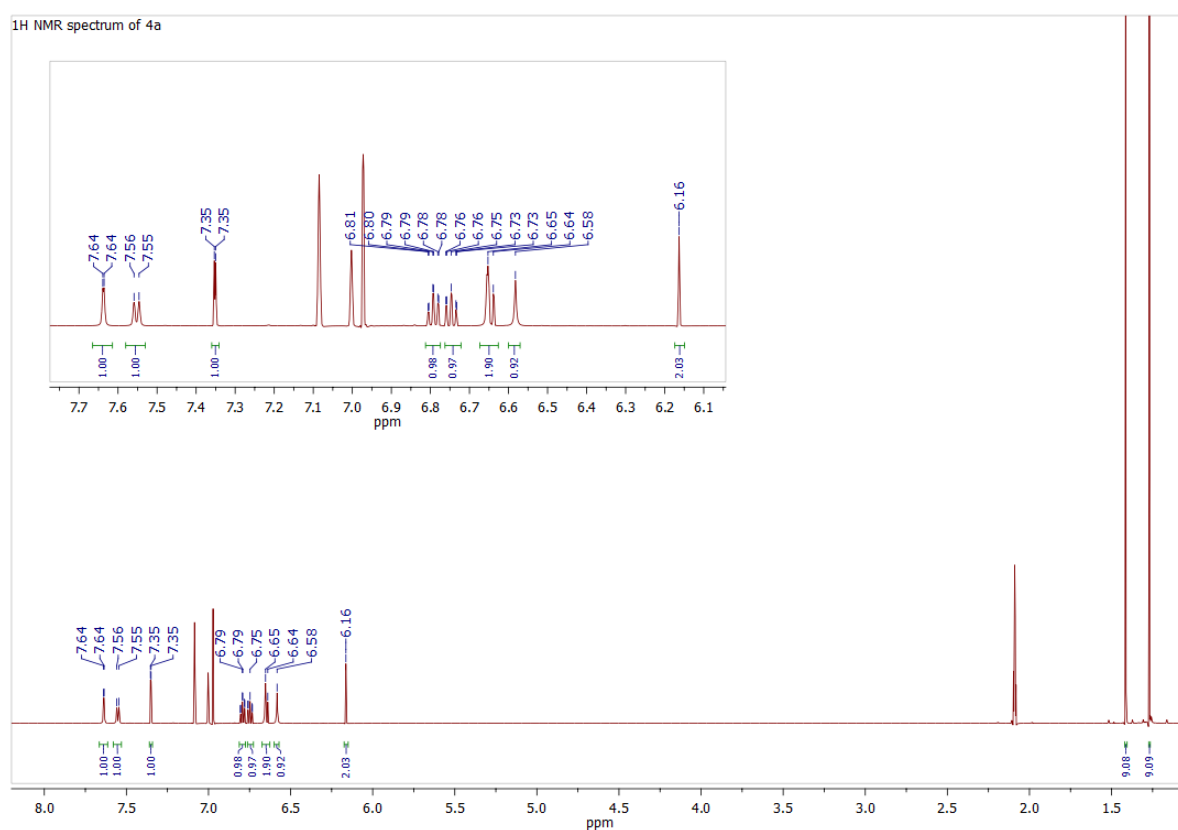

Fig. S17.  $^1\text{H}$  NMR spectrum of **4a**.

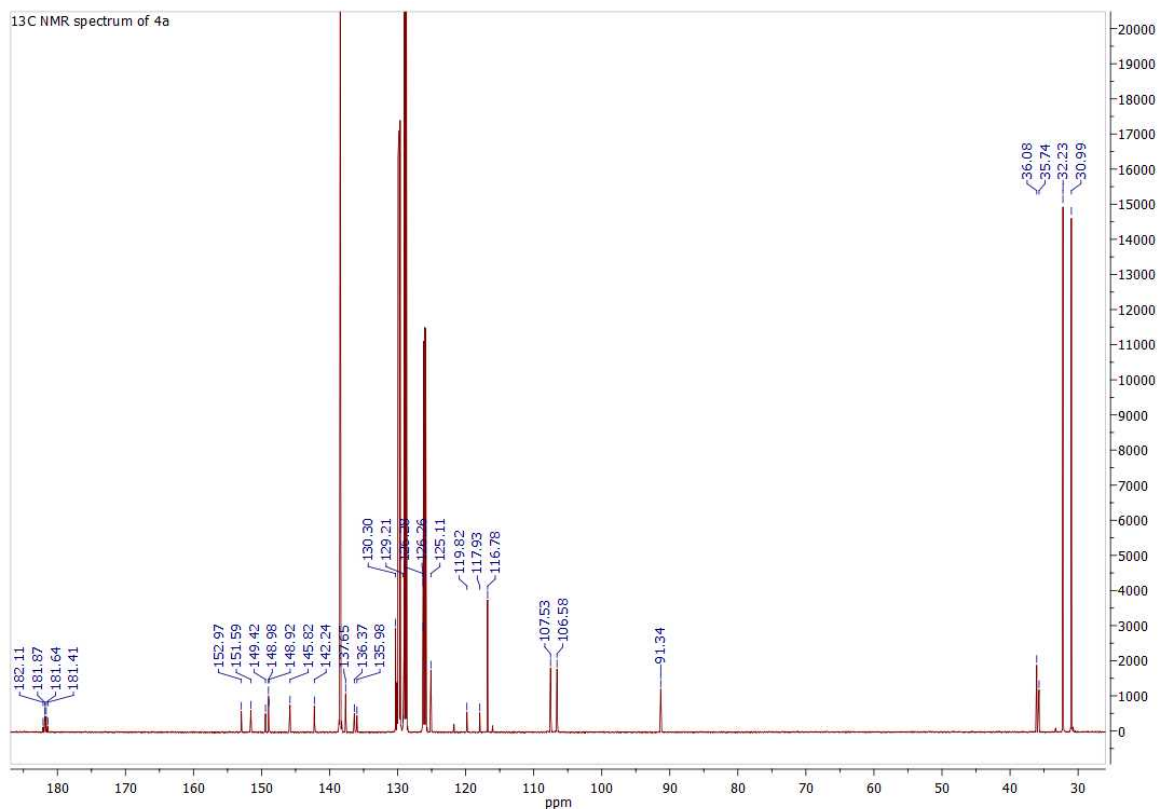

Fig. S18.  $^{13}\text{C}$  NMR spectrum of **4a**.

NMR spectra of (2,4-di-(tert-butyl)-9-chlorobenzo[5,6][1,4]oxazine[2,3-b]phenoxazine)-bis-(1,1,1,5,5,5-hexafluoro-pentane-2,4-dioate) Zn (II) **4b**

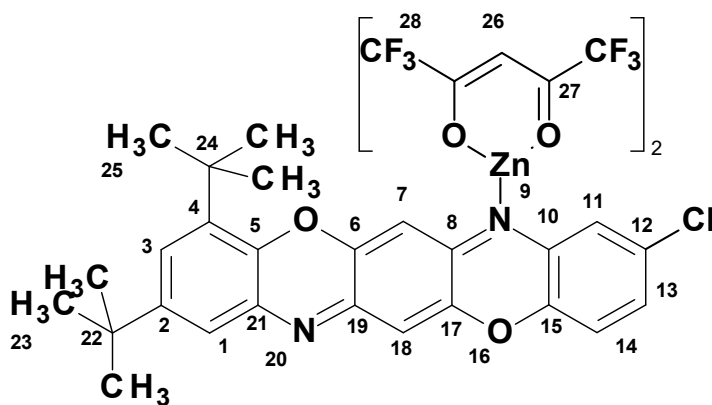

|           |                               |        |        |        |        |        |        |        |        |        |        |        |         |        |
|-----------|-------------------------------|--------|--------|--------|--------|--------|--------|--------|--------|--------|--------|--------|---------|--------|
|           | Nuclear                       | 1      | 2      | 3      | 4      | 5      | 6      | 7      | 8      | 10     | 11     | 12     | 13      | 14     |
|           | $^1\text{H}$                  | 7.67   |        | 7.40   |        |        |        | 6.50   |        |        | 7.54   |        | 6.36    | 6.68   |
| <b>4b</b> | $J_{\text{1H-1H}}$            | 2.2    |        | 2.2    |        |        |        |        |        |        | 2.4    |        | 8.7;2.4 | 8.7    |
|           | $^{13}\text{C}/^{15}\text{N}$ | 125.16 | 137.53 | 126.38 | 149.37 | 142.22 | 153.49 | 106.71 | 149.65 | 131.30 | 128.69 | 136.25 | 130.14  | 117.65 |
|           | $J_{^{13}\text{C-19F}}$       |        |        |        |        |        |        |        |        |        |        |        |         |        |
|           | Nuclear                       | 15     | 17     | 18     | 19     | 21     | 22     | 23     | 24     | 25     | 26     | 27     | 28      |        |
|           | $^1\text{H}$                  |        |        | 6.58   |        |        |        | 1.40   |        | 1.27   | 6.15   |        |         |        |
| <b>4b</b> | $J_{\text{1H-1H}}$            |        |        |        |        |        |        |        |        |        |        |        |         |        |
|           | $^{13}\text{C}/^{15}\text{N}$ | 144.21 | 151.55 | 107.44 | 148.97 | 137.25 | 36.15  | 30.98  | 36.08  | 32.24  | 91.33  | 181.61 | 118.87  |        |
|           | $J_{^{13}\text{C-19F}}$       |        |        |        |        |        |        |        |        |        |        | 35.1   | 286.1   |        |

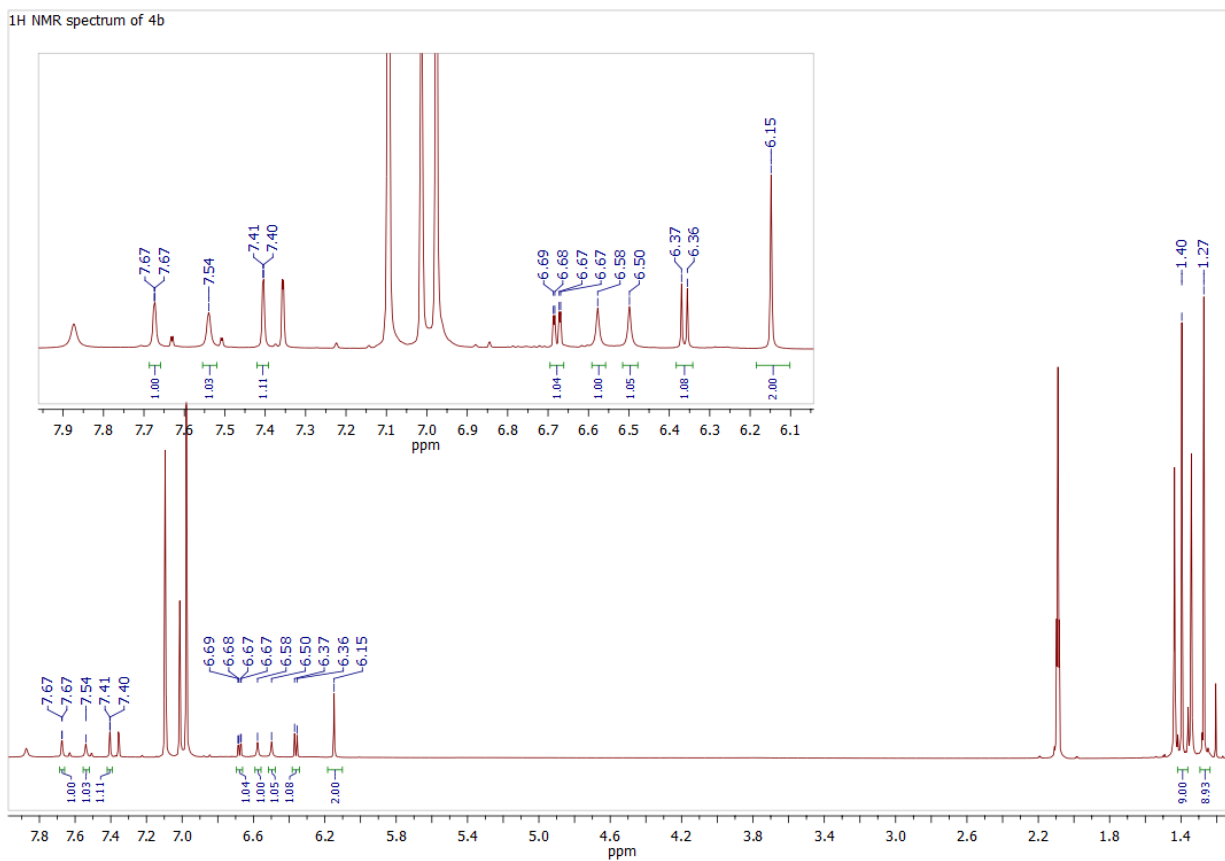

Fig. S19. <sup>1</sup>H NMR spectrum of 4b·TPDO.

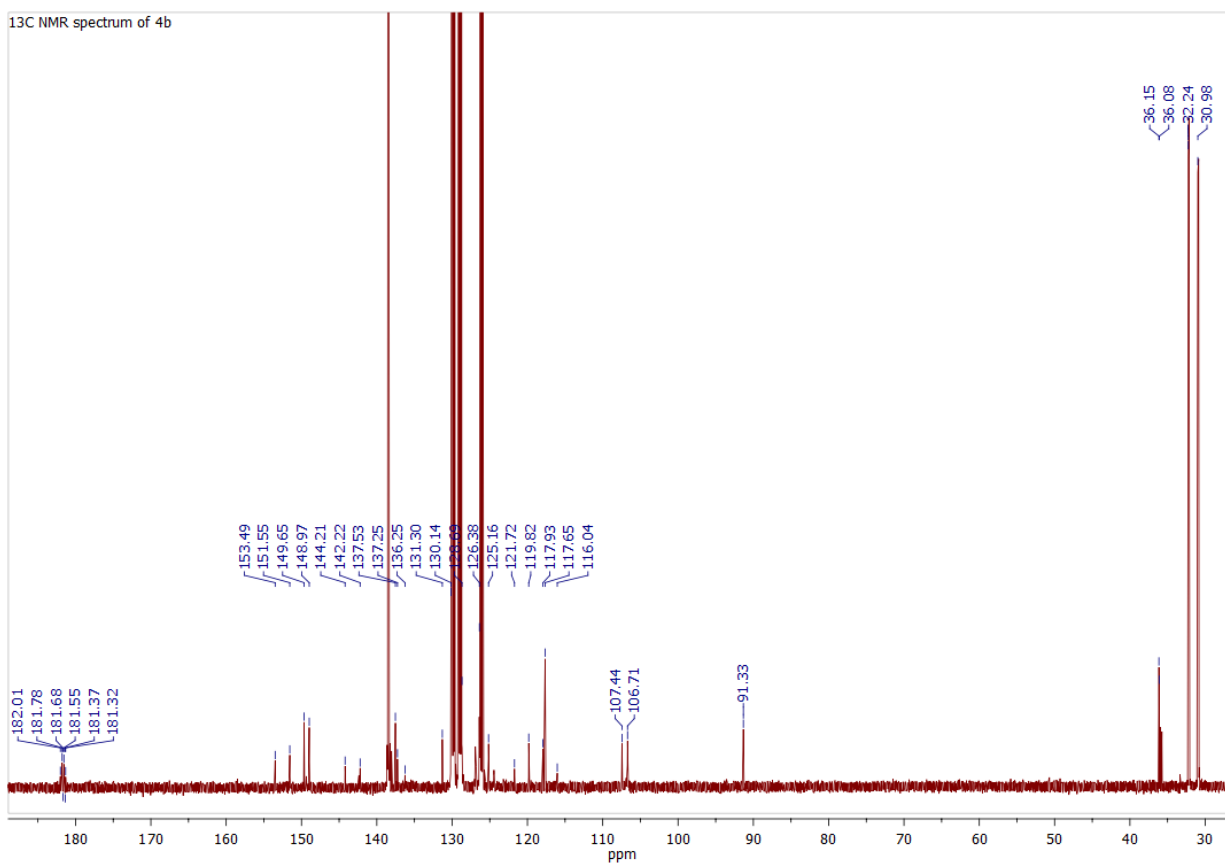

Fig. S20. <sup>13</sup>C NMR spectrum of 4b·TPDO.

NMR spectra of (2,4-di-(tert-butyl)-10-nitrobenzo[5,6][1,4]oxazine[2,3-b]phenoxazine)-bis-(1,1,1,5,5,5-hexafluoro-pentane-2,4-dioate) Zn (II) **4c**

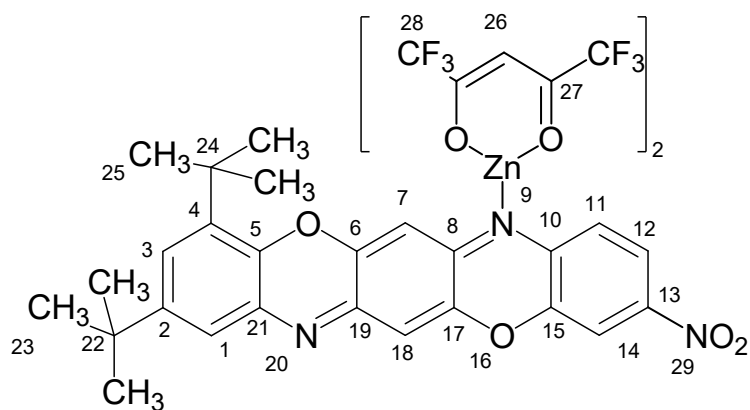

|                                     |        |        |        |        |                      |        |        |        |                     |        |        |         |        |                      |
|-------------------------------------|--------|--------|--------|--------|----------------------|--------|--------|--------|---------------------|--------|--------|---------|--------|----------------------|
| Nuclear                             | 1      | 2      | 3      | 4      | 5                    | 6      | 7      | 8      | 9( <sup>15</sup> N) | 10     | 11     | 12      | 13     | 14                   |
| <sup>1</sup> H                      | 7.81   |        | 7.41   |        |                      |        | 6.55   |        |                     |        | 6.23   | 7.49    |        | 8.32                 |
| <b>4c</b> <i>J</i> <sub>1H-1H</sub> | 2.4    |        | 2.4    |        |                      |        |        |        |                     |        | 8.8    | 8.8;2.6 |        | 2.6                  |
| <sup>13</sup> C/ <sup>15</sup> N    | 124.89 | 138.01 | 127.66 | 149.86 | 142.33               | 153.54 | 106.92 | 148.53 | 366.43              | 135.56 | 117.11 | 125.12  | 149.01 | 124.18               |
| <i>J</i> <sub>13C-19F</sub>         |        |        |        |        |                      |        |        |        |                     |        |        |         |        |                      |
| Nuclear                             | 15     | 17     | 18     | 19     | 20( <sup>15</sup> N) | 21     | 22     | 23     | 24                  | 25     | 26     | 27      | 28     | 29( <sup>15</sup> N) |
| <sup>1</sup> H                      |        |        | 6.78   |        |                      |        |        | 1.38   |                     | 1.31   | 6.16   |         |        |                      |
| <b>4c</b> <i>J</i> <sub>1H-1H</sub> |        |        |        |        |                      |        |        |        |                     |        |        |         |        |                      |
| <sup>13</sup> C/ <sup>15</sup> N    | 146.28 | 151.26 | 108.04 | 149.32 |                      | 135.15 | 35.92  | 30.89  | 36.14               | 32.12  | 91.51  | 181.80  | 118.83 | 364.58               |
| <i>J</i> <sub>13C-19F</sub>         |        |        |        |        |                      |        |        |        |                     |        |        | 35.1    | 285.4  |                      |

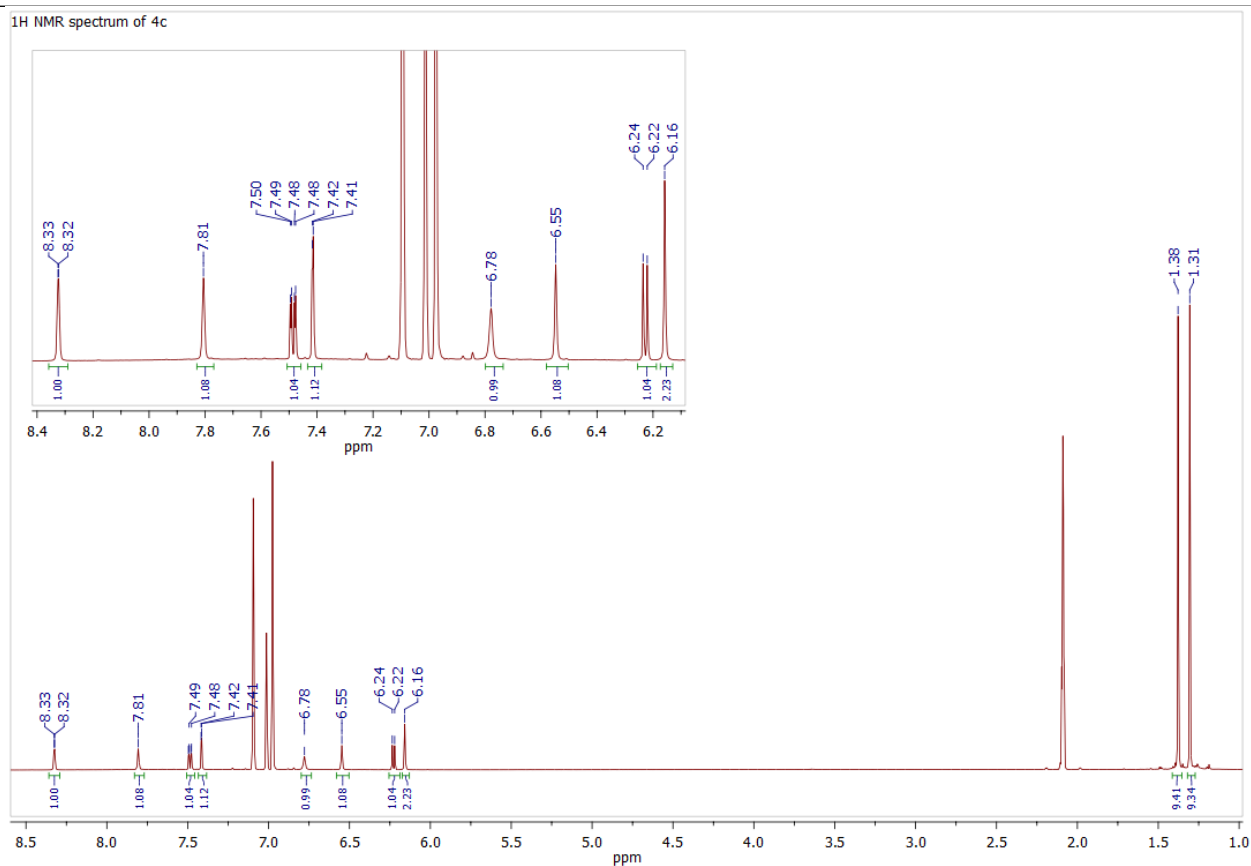

Fig. S21. <sup>1</sup>H NMR spectrum of **4c**.

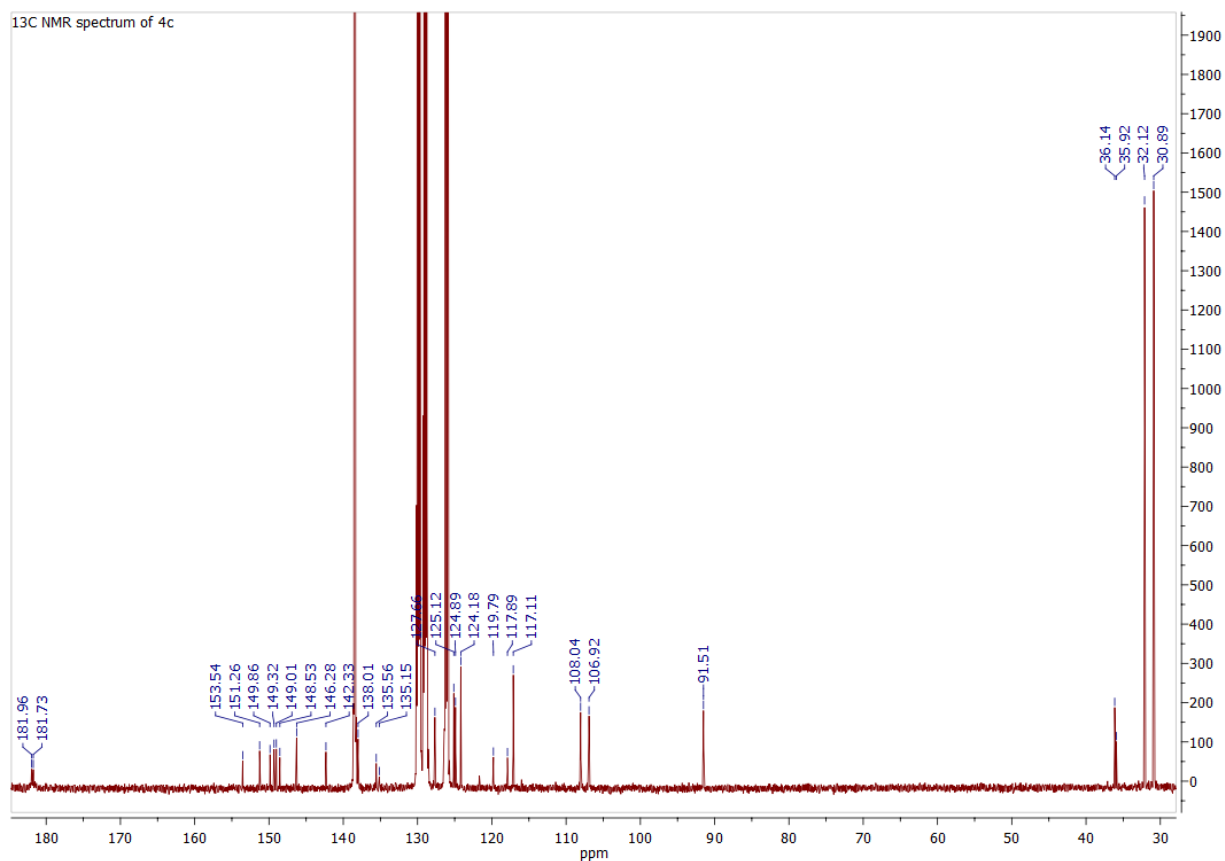

Fig. S22.  $^{13}\text{C}$  NMR spectrum of **4c**.

NMR spectra of (2,4,9,11-tetra-(tert-butyl)-benzo[5,6][1,4]oxazine[2,3-b]phenoxazine)-bis-(bis-(1,1,1,5,5,5-hexafluoro-pentane-2,4-dioate)Zn(II)) **5d**.

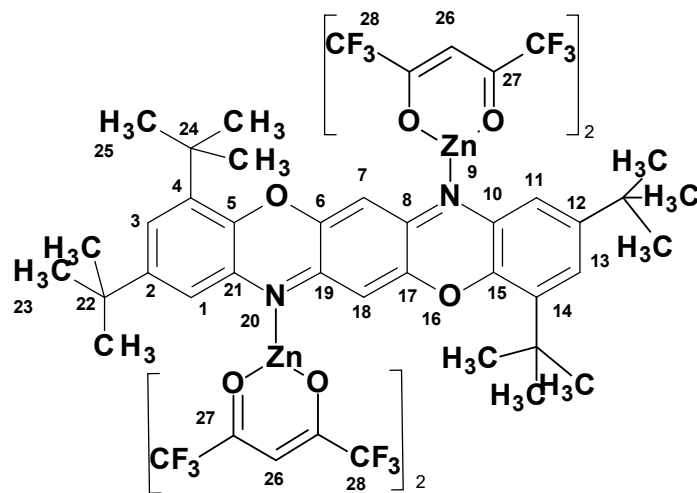

| Nuclear                           | 1      | 2      | 3      | 4      | 5      | 6      | 7      | 19     | 22    | 23    | 24    | 25    | 26    | 27     | 28     |
|-----------------------------------|--------|--------|--------|--------|--------|--------|--------|--------|-------|-------|-------|-------|-------|--------|--------|
| $^1\text{H}$                      | 7.98   |        | 7.44   |        |        |        | 7.19   |        |       | 1.44  |       | 1.37  | 6.13  |        |        |
| $J_{\text{H-H}}$                  | 1.68   |        | 1.68   |        |        |        |        |        |       |       |       |       |       |        |        |
| $^{13}\text{C}/^{15}\text{N}$     | 124.11 | 138.25 | 127.75 | 149.81 | 142.43 | 151.03 | 106.84 | 150.33 | 36.08 | 30.79 | 36.20 | 32.08 | 91.31 | 181.71 | 118.84 |
| $J_{^{13}\text{C}-^{19}\text{F}}$ |        |        |        |        |        |        |        |        |       |       |       |       |       | 35.3   | 284.7  |

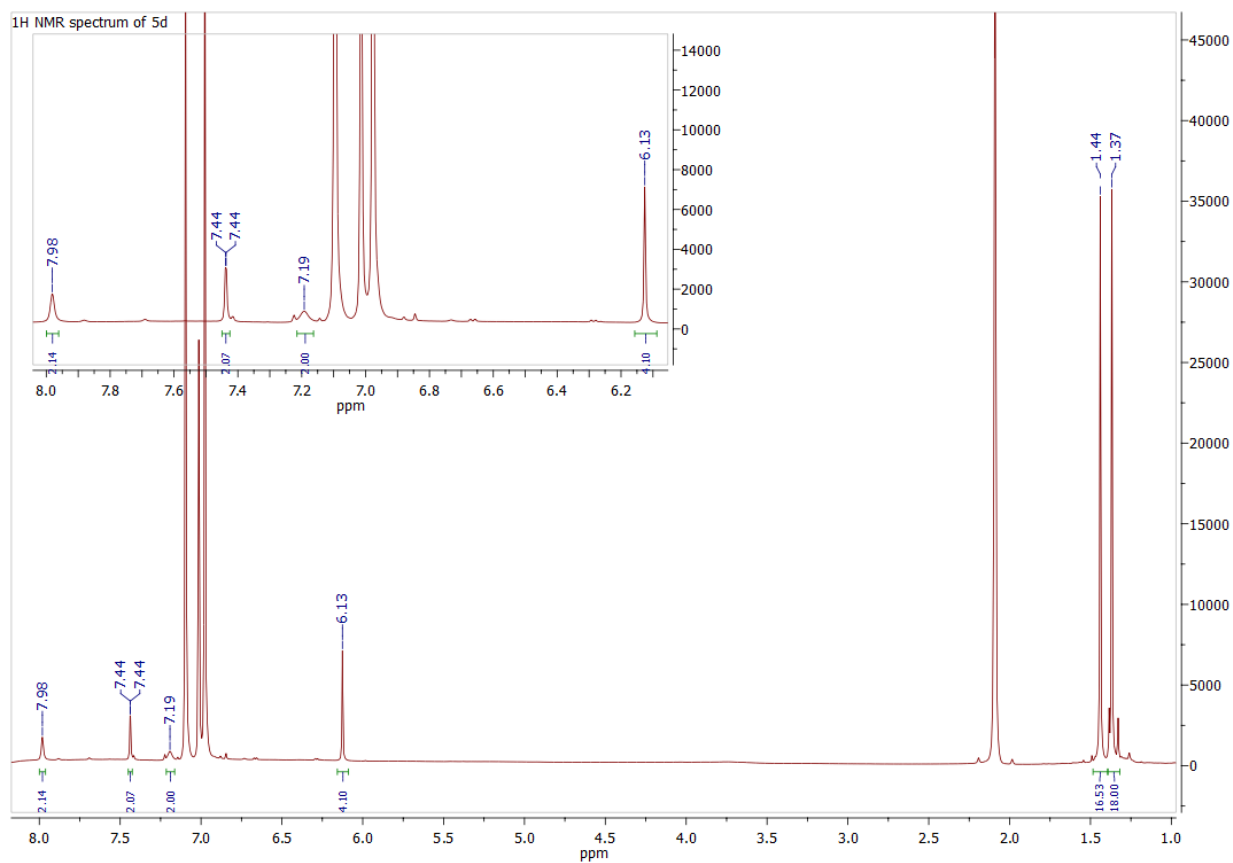

Fig. S23. <sup>1</sup>H NMR spectrum of **5d**.

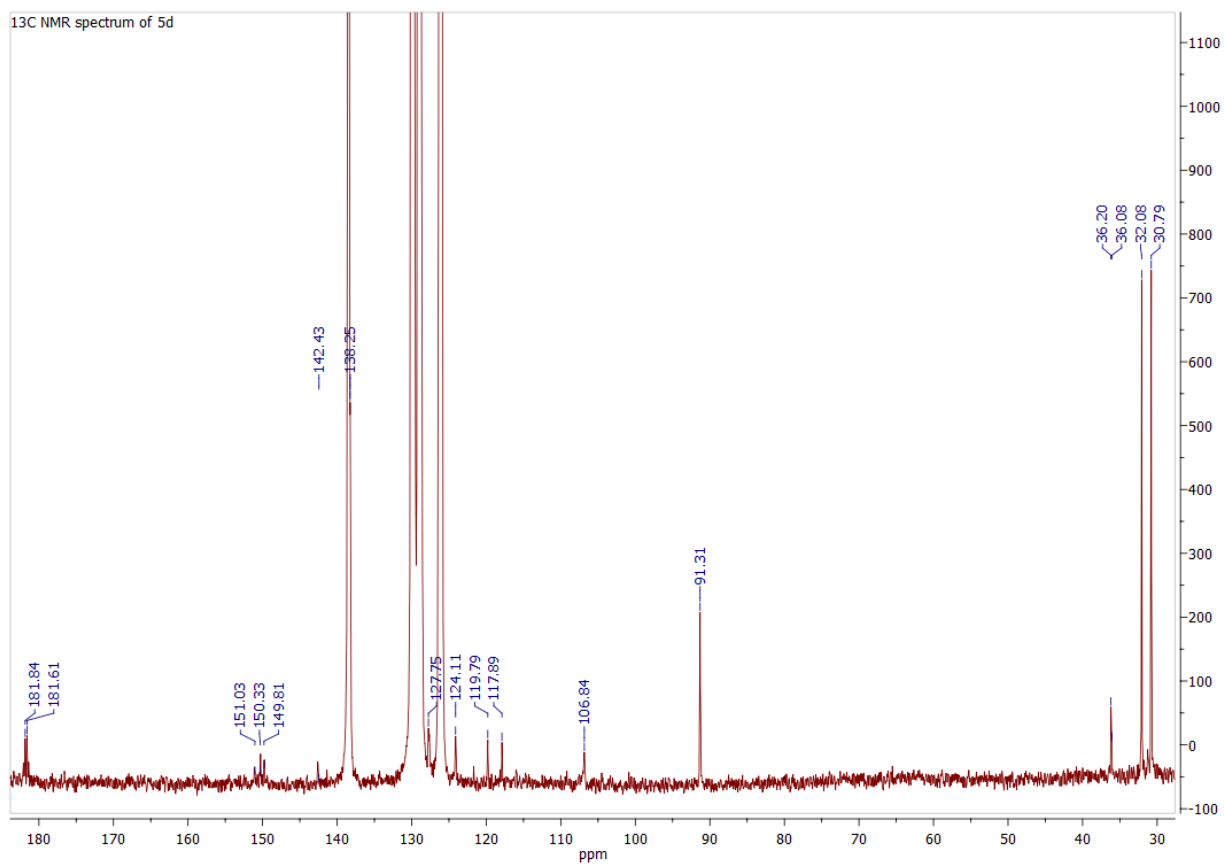

Fig. S24. <sup>13</sup>C NMR spectrum of **5d**.
